# Supplementary material for: An evolutionarily conserved ubiquitin ligase drives infection and transmission of flaviviruses
Source: PubMed Central journal article supplement — Proc Natl Acad Sci U S A. 2024 Apr 9;121(16):e2317978121. doi: 10.1073/pnas.2317978121 (PMC11032495; doi:10.1073/pnas.2317978121), 2024-04-09
Supplement: pnas.2317978121.sapp.pdf [file pnas.2317978121.sapp.pdf]

## **Supplementary information for**

An evolutionarily conserved ubiquitin ligase drives infection and transmission of flaviviruses

### **Authors**

Linjuan Wu, Liming Zhang, Shengyong Feng, Lu Chen, Cai Lin, Gang Wang, Yibin Zhu, Penghua Wang, Gong Cheng\*

\*Correspondence to: Gong Cheng Ph.D., School of Basic Medical Sciences, Tsinghua University, Beijing, P.R. China, 100084. Phone: (+86)-10-62788494; Fax: (+86)-10-62788494. Email: [gongcheng@mail.tsinghua.edu.cn](mailto:gongcheng@mail.tsinghua.edu.cn)

This PDF file includes:

Supporting text

Figures S1 to S13

Tables S1 to S4

SI Reference

## Supporting text

### Materials and Methods

#### Cell viability assay

The cell viability was measured by Cell Counting Kit-8 (CCK-8) (C0038, Beyotime) assay. Aag2 cells were transfected with dsRNAs against either *AaHRD1* or *GFP* genes, and A549 cells were transfected with either *HsHRD1* or negative control (NC) siRNAs for 48h. The CCK-8 solution was added and incubated for 1 h, and then the absorbance was measured at 450 nm.

#### EC50 quantification

C6/36 cells or A549 cells were infected with 0.1 MOI DENV2 and simultaneously incubated with different concentrations of LS-102 for 1 h. The cells were then washed and cultured with fresh medium containing LS-102 for 48 h. Viral yield in cell supernatant samples was quantified using a standard curve. To generate standard curve of DENV2, a segment of DENV2 genome containing the segment for qRT-PCR detection was generated. The PCR products contained the T7 promoter on positive strands, and acted as DNA templates for *in vitro* transcription using the MEGAscript T7 Transcription Kit (AM1334, Ambion) by following the manufacturers' instructions. The number of single-stranded RNA copies was measured as described previously (1). The concentration of LS-102 required to 50% of maximal effect ( $EC_{50}$ ) was calculated by comparing the values with the DMSO-treated cells in Graphpad Prism 8.0 (GraphPad Software).

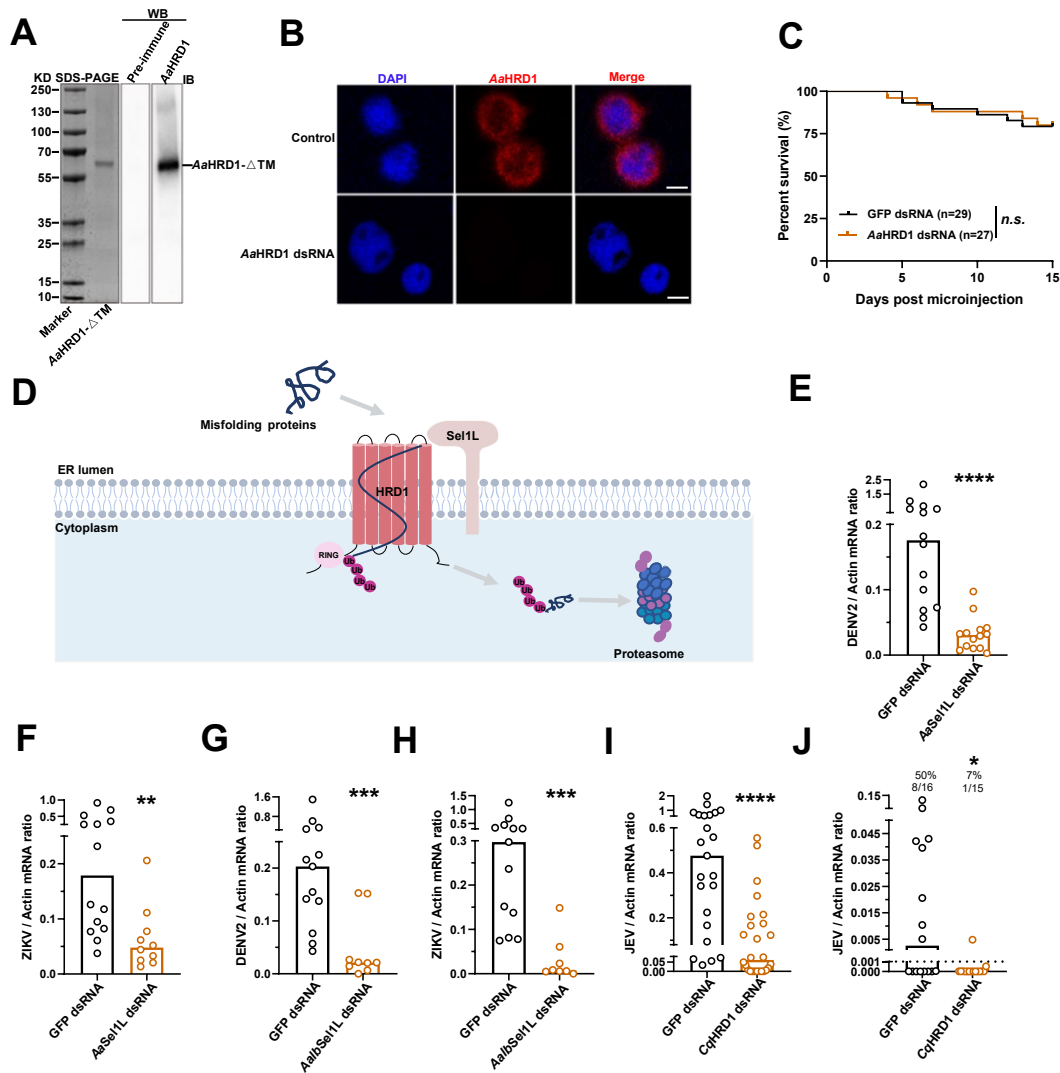

**Fig. S1. HRD1s facilitate the infection of flavivirus in mosquitoes, related to Fig.1.**

(A) The preparation of anti-*AaHRD1* murine polyclonal antibodies. The plasmid encoding *AaHRD1*- $\Delta$ TM was expressed in the *E. coli* BL21 DE3 strain, and formed the inclusion bodies, followed by purification and dissolving in urea. The purified *AaHRD1*- $\Delta$ TM protein as an immune antigen to immunize with mice as described in Materials and Methods. The immune antigen was detected by staining with Coomassie blue and analyzed via WB with anti-*AaHRD1* murine antibodies. (B) The validation specificity of anti-*AaHRD1* antibodies via immunofluorescence assay. Aa2 cells were cultured in 24-wells overnight, and then were transfected with or without *AaHRD1* dsRNA. After 48 hours transfection, cells were fixed and incubated with anti-*AaHRD1* murine polyclonal antibodies overnight and then stained with Alexa Fluor 594-conjugated anti-mouse IgG. The nuclei were stained with DAPI and then analyzed via immunofluorescence assay. Scar bars, 5  $\mu$ m. (C) Silencing *AaHRD1* did not

influence the survival of mosquitoes. Female *A. aegypti* mosquitoes were inoculated with dsRNAs against *HRD1* or *GFP* genes via thoracic microinjection. The survival of *A. aegypti* mosquitoes were daily recorded. **(D)** Schematic of the association of HRD1 with Sel1L in the ERAD pathway. **(E, F)** Silencing *AaSel1L* inhibited DENV2 and ZIKV infections in *A. aegypti*. *A. aegypti* mosquitoes were inoculated with *AaSel1L* dsRNA for 3 days and then thoracically infected with 10 M.I.D.<sub>50</sub> of DENV2 or ZIKV. Viral loads of DENV2 **(E)** and ZIKV **(F)** were determined via qPCR and normalized against *A. aegypti* actin. **(G, H)** Knockdown of *AalbSel1L* impaired DENV2 and ZIKV infections in *A. albopictus*. The *AalbSel1L* dsRNA was microinjected into *A. albopictus* mosquitoes, followed by inoculation with 10 M.I.D.<sub>50</sub> of DENV2 or ZIKV 3 days later. Viral loads of DENV2 **(G)** and ZIKV **(H)** were determined via qPCR and normalized against *A. albopictus* actin. **(I, J)** Silencing *CqHRD1* inhibited JEV infection in *C. quinquefasciatus*. *C. quinquefasciatus* mosquitoes were inoculated with dsRNA of *CqHRD1* and microinjected with *GFP* dsRNA served as a negative control. Ten M.I.D.<sub>50</sub> of JEV was inoculated at 3 days post dsRNA microinjection, and viral loads were assessed at 3 days postinfection via SYBR qPCR and normalized against *C. quinquefasciatus* actin **(I)**. *CqHRD1* dsRNA was inoculated into *C. quinquefasciatus* mosquitoes. After 3 days post microinjection, Human blood (50% v/v) and supernatant from JEV-infected Vero cells (50% v/v) were used to feed *C. quinquefasciatus* via an *in vitro* membrane feeding system. The infectivity of JEV were measured at 8 days after a blood meal via qPCR **(J)**. **(C)** The data were analyzed statistically using the log-rank (Mantel–Cox) test. **(E–J)** One dot represents one mosquito, and the median value of the results was shown. Data were analyzed statistically using the Mann–Whitney test **(E–I)**. The number of infected mosquitoes/total number of mosquitoes is shown at the top of each column. The limit of detection for the viral genome/actin ratio is 0.001, indicating with the black dashed line. Differences in the infectivity ratio were compared using Fisher’s exact test **(J)**. \*P < 0.05, \*\*P < 0.01, \*\*\*P < 0.001, \*\*\*\*P < 0.0001, *n.s.*, not significant (P > 0.05).

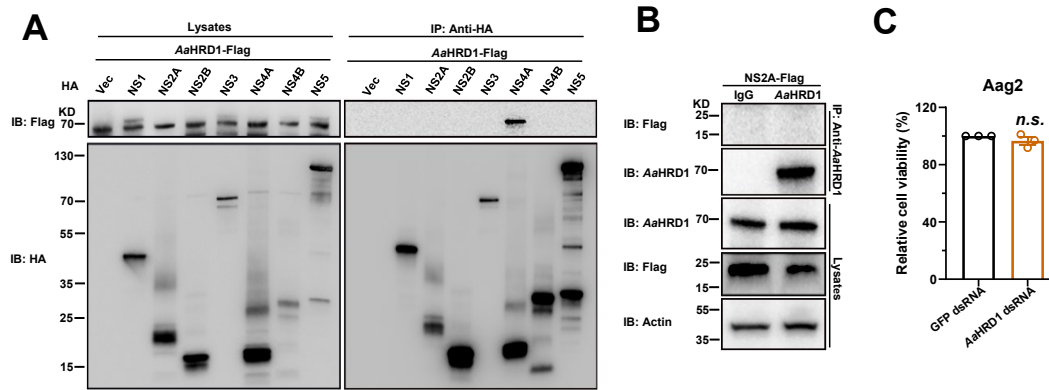

**Fig. S2. *AaHRD1* interacts with DENV2 NS4A.**

**(A)** The interplay of *AaHRD1* with nonstructural proteins of DENV2. Recombinant plasmids encoding codon optimized *AaHRD1* and DENV2 nonstructural proteins were cotransfected into HEK293T cells. Cell lysates were subjected to IP with anti-HA antibodies and analyzed via Western blot (WB). **(B)** DENV2 NS2A did not interact with endogenous *AaHRD1*. Aag2 cells were transfected with plasmid encoding NS2A with the Flag tag. After 48 hours transfection, cell lysates were subjected to IP with anti-*AaHRD1* murine polyclonal antibodies and analyzed via WB. **(C)** Silencing *AaHRD1* did not influence the cell viability. Aag2 cells were transfected with indicated dsRNAs. After 48 hours transfection, cell viability was measured via CCK-8 Kit. Relative cell viability (%) = (Experiment value-black control value/negative control value-blank control value). **(A-B)** These experiments were repeated three times with similar results. **(C)** Data are presented as the mean $\pm$ SEM and were analyzed statistically using the unpaired t test. \*P < 0.05, \*\*P < 0.01, \*\*\*P < 0.001, \*\*\*\*P < 0.0001, *n.s.*, not significant (P > 0.05).

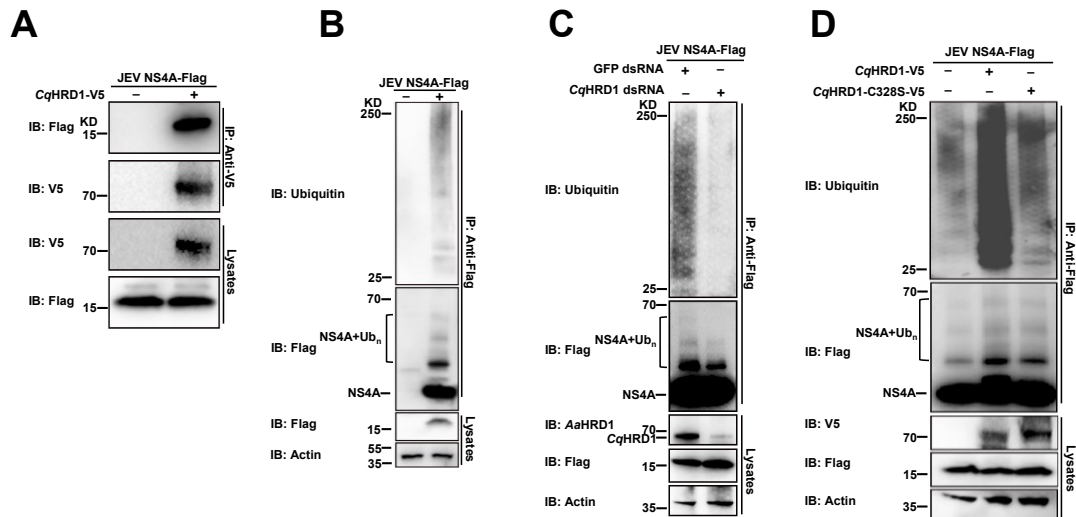

**Fig. S3. *CqHRD1* interacts and ubiquitylates JEV NS4A.**

(A) *CqHRD1* interacted with JEV NS4A. Recombinant plasmids expressing *CqHRD1* and JEV NS4A were cotransfected into Cxq-1 cells for 48 h. Cell lysates were subjected to IP with anti-V5 antibodies and analyzed via WB. (B) JEV NS4A is ubiquitinated in Cxq-1 cells. A plasmid encoding JEV NS4A was transfected into Cxq-1 cells. Cell lysates were subjected to IP with anti-Flag antibodies, and the level of NS4A ubiquitination was measured with anti-Ub. (C) Silencing endogenous *CqHRD1* impaired the ubiquitination of JEV NS4A. Cxq-1 cells were transfected with *CqHRD1* dsRNA 3 days later, and the cells were transfected with JEV NS4A. The level of NS4A ubiquitination was measured with anti-Ub. (D) Overexpression of *CqHRD1* enhanced the ubiquitination of JEV NS4A. S2 cells were transfected with the indicated plasmids. IP was performed with anti-Flag antibodies, followed by immunoblotting with anti-Ub to measure the level of NS4A ubiquitination. (A-D) These experiments were repeated three times with similar results.

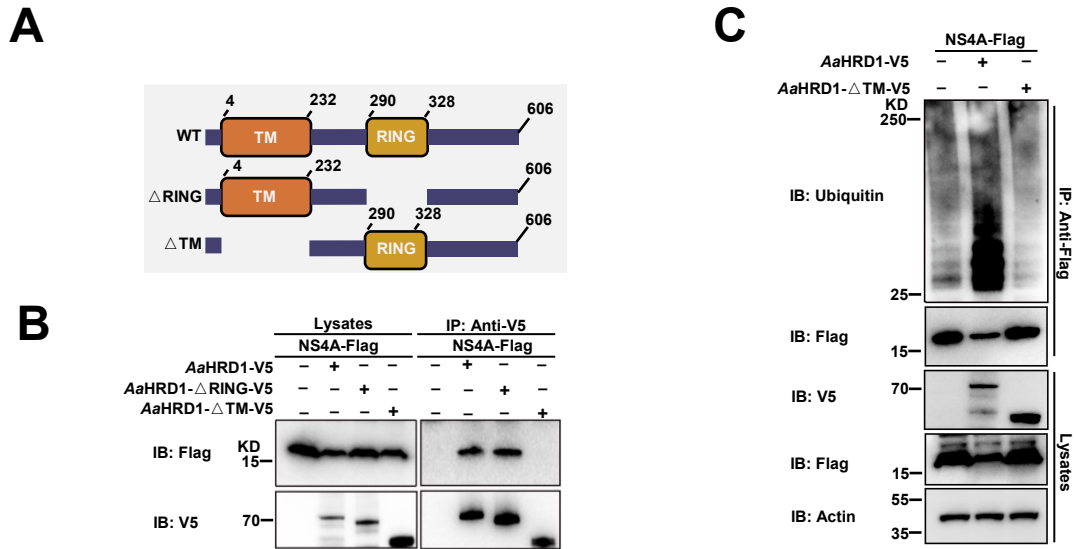

**Fig. S4. The transmembrane of *AaHRD1* is indispensable for the interaction with NS4A.** (A) Identification of functional domains of *AaHRD1* based on its structure. (B) The transmembrane domain of *AaHRD1* mediated the interaction with NS4A. S2 cells were transfected with the indicated plasmids. IP was conducted with anti-V5 antibodies and analyzed via WB. (C) *AaHRD1*- $\Delta$ TM was unable to ubiquitinate NS4A. S2 cells were transfected with the indicated plasmids. The level of NS4A ubiquitination was determined. (B-C) These experiments were repeated three times with similar results.

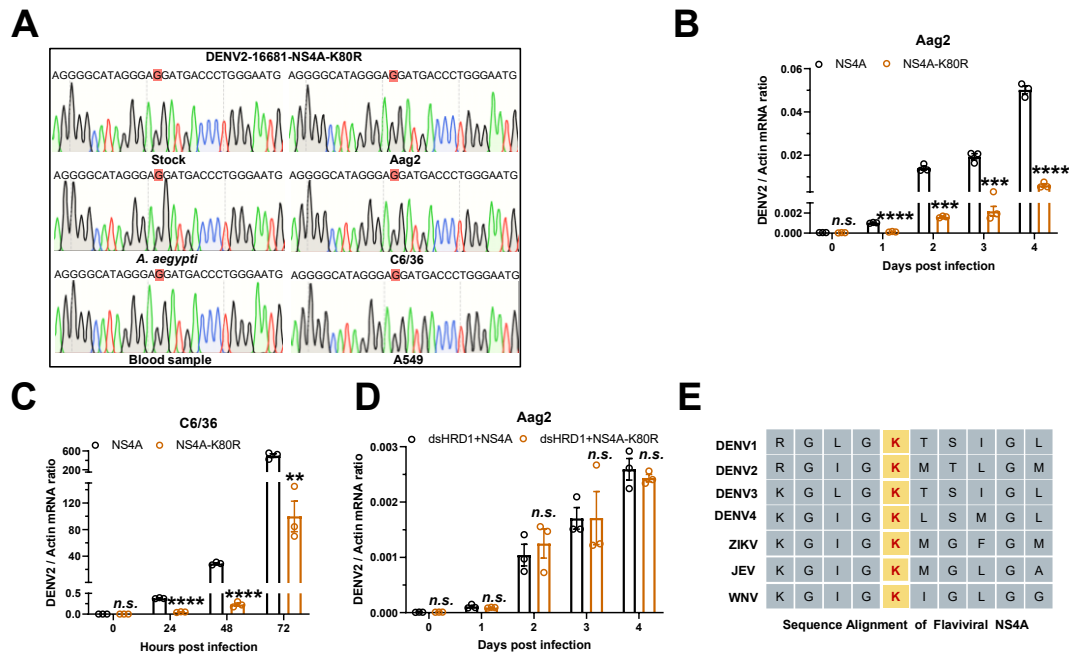

**Fig. S5. The replication of DENV2-16681-NS4A-K80R in mosquito cells.**

(A) The NS4A-K80R substitution was stable in DENV2-16681-NS4A-K80R. The rescued DENV2-16681-NS4A-K80R mutant stock was passaged 5 times. The rescued mutant stock and the samples of infected cells or animals were sequenced. (B, C) Infections of NS4A/NS4A-K80R strains in Aag2 or C6/36 cells. Aag2 or C6/36 cells were infected with NS4A or NS4A-K80R strain at an MOI of 0.1. Viral loads were measured at the indicated time via qPCR. Viral loads were normalized against *A. aegypti actin* (B) and *A. albopictus actin* (C). (D) Infections of NS4A/NS4A-K80R strains in *AaHRD1*-silenced Aag2 cells. Aag2 cells were transfected with *AaHRD1* dsRNA for 3 days and then infected with NS4A or NS4A-K80R strain at an MOI of 0.1. Viral loads were determined at the indicated time via qPCR. (E) Conservative analysis of lysine (K) at the 80<sup>th</sup> residue of DENV NS4A among flaviviral NS4As. (B-D) Data are presented as the mean±SEM and analyzed statistically using the unpaired t test. \*P < 0.05, \*\*P < 0.01, \*\*\*P < 0.001, \*\*\*\*P < 0.0001, n.s., not significant (P > 0.05).



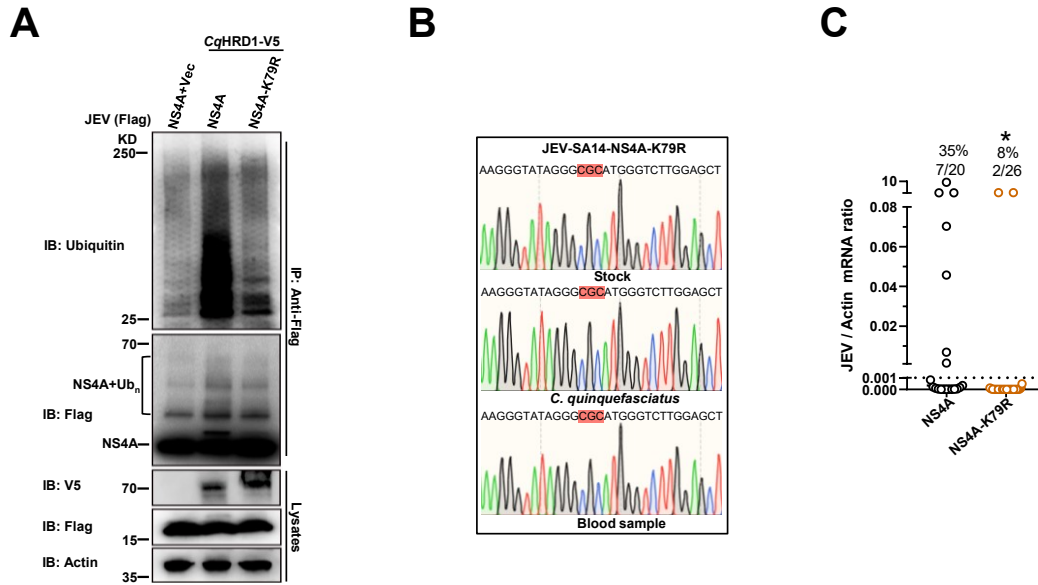

**Fig. S6. The K79R substitution of NS4A reduces JEV replication in *C. quinquefasciatus*.**

(A) *CqHRD1* ubiquitylated the 79<sup>th</sup> lysine residue of JEV NS4A. S2 cells were transfected with the indicated plasmids. IP was conducted, and then the level of NS4A ubiquitination was measured. (B) The NS4A-K79R substitution was stable in JEV-SA14-NS4A-K79R. The rescued mutant stock JEV-SA14-NS4A-K79R was passaged 5 times. The rescued mutant stock and the samples of infected animals were sequenced. (C) Infections of NS4A/NS4A-K79R strains in *C. quinquefasciatus*. Either NS4A or NS4A-K79R strain (500  $\mu$ l) and 500  $\mu$ l fresh human blood were mixed and then fed on *C. quinquefasciatus* via an *in vitro* blood feeding system. Viral infectivity was determined at 8 days after a blood meal by qPCR. (A) The experiment was repeated for three time with similar results. (C) One dot represents one mosquito, and the median value of the results was shown. The number of infected mosquitoes/total number of mosquitoes is shown at the top of each column. The limit of detection for the viral genome/actin ratio is 0.001, indicating with the black dashed line. Differences in the infectivity ratio were compared using Fisher's exact test. \* $P < 0.05$ , \*\* $P < 0.01$ , \*\*\* $P < 0.001$ , \*\*\*\* $P < 0.0001$ , *n.s.*, not significant ( $P > 0.05$ ).

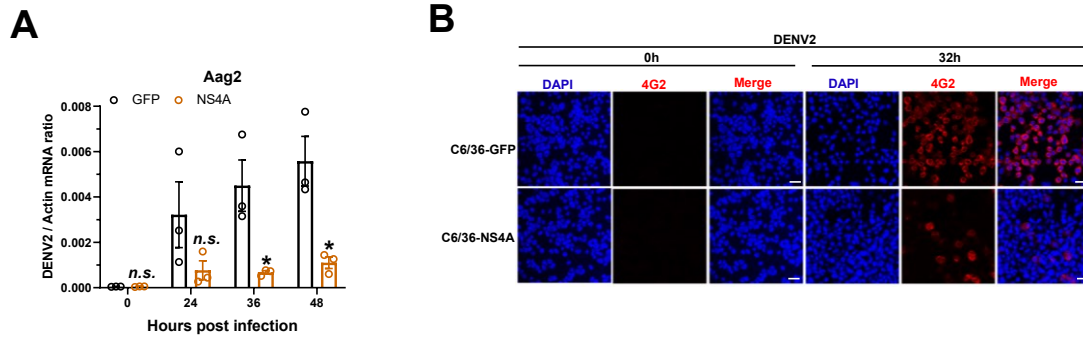

**Fig. S7. Overexpression of NS4A inhibits DENV2 replication in mosquito cells.**

**(A-B)** Overexpression of NS4A impaired DENV2 infection. Aag2 cells were transfected with plasmids expressing NS4A or GFP and then incubated with MG132 (10  $\mu$ M) for 12 h, followed by inoculation with DENV2 at an MOI of 0.01. Viral loads were assessed at the indicated time via qPCR and normalized against *A. aegypti actin* **(A)**. C6/36 cells stably expressing GFP or NS4A were infected DENV2 at 0.01 MOI, and then were harvested, fixed, and then stained with anti-4G2, followed by staining with Alexa Fluor 594-conjugated anti-mouse IgG. Scale bars, 10  $\mu$ m **(B)**. **(A)** Data are presented as the mean $\pm$ SEM and analyzed statistically using the unpaired t test. \*P < 0.05, \*\*P < 0.01, \*\*\*P < 0.001, \*\*\*\*P < 0.0001, *n.s.*, not significant (P > 0.05).

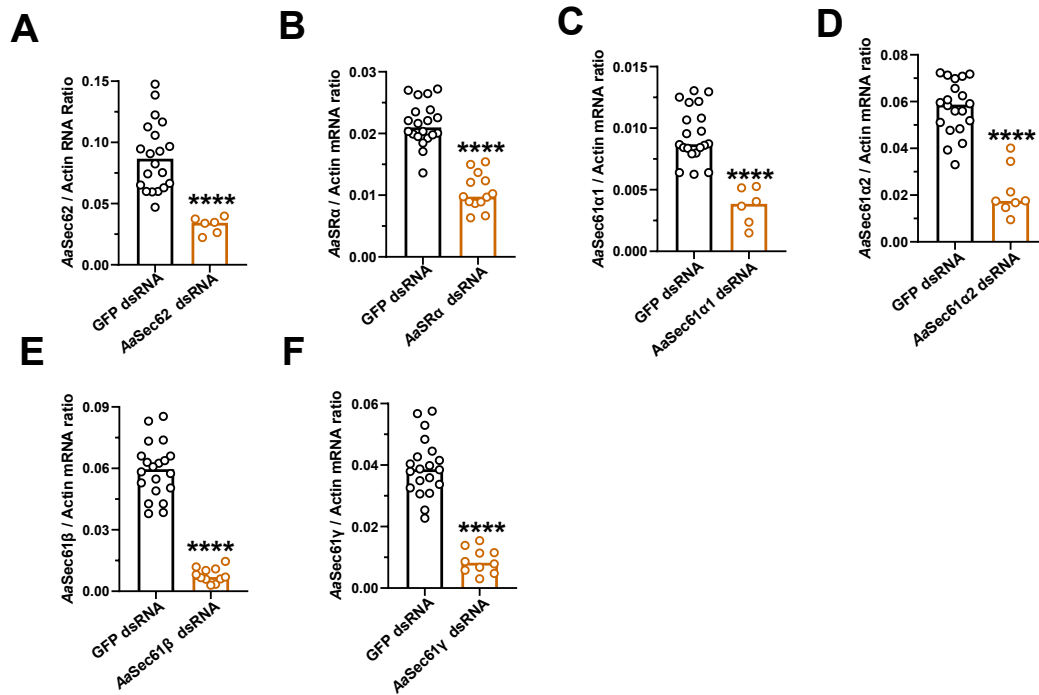

**Fig. S8.** The determination of silencing efficiency of ER translocation complex. *A. aegypti* were inoculated dsRNAs against of *AaSec62*, *AaSR $\alpha$* , *AaSec61- $\alpha/\beta/\gamma$*  genes and microinjected with *GFP* dsRNA served as a negative control. The knockdown efficiency of *AaSec62*, *AaSR $\alpha$* , *AaSec61 $\alpha$ 1*, *AaSec61 $\alpha$ 2*, *AaSec61 $\beta$* , *AaSec61 $\gamma$*  were measured via qPCR. One dot represents one mosquito, and the median value of the results was shown. Data were analyzed statistically using the Mann–Whitney test. \* $P < 0.05$ , \*\* $P < 0.01$ , \*\*\* $P < 0.001$ , \*\*\*\* $P < 0.0001$ , *n.s.*, not significant ( $P > 0.05$ ).

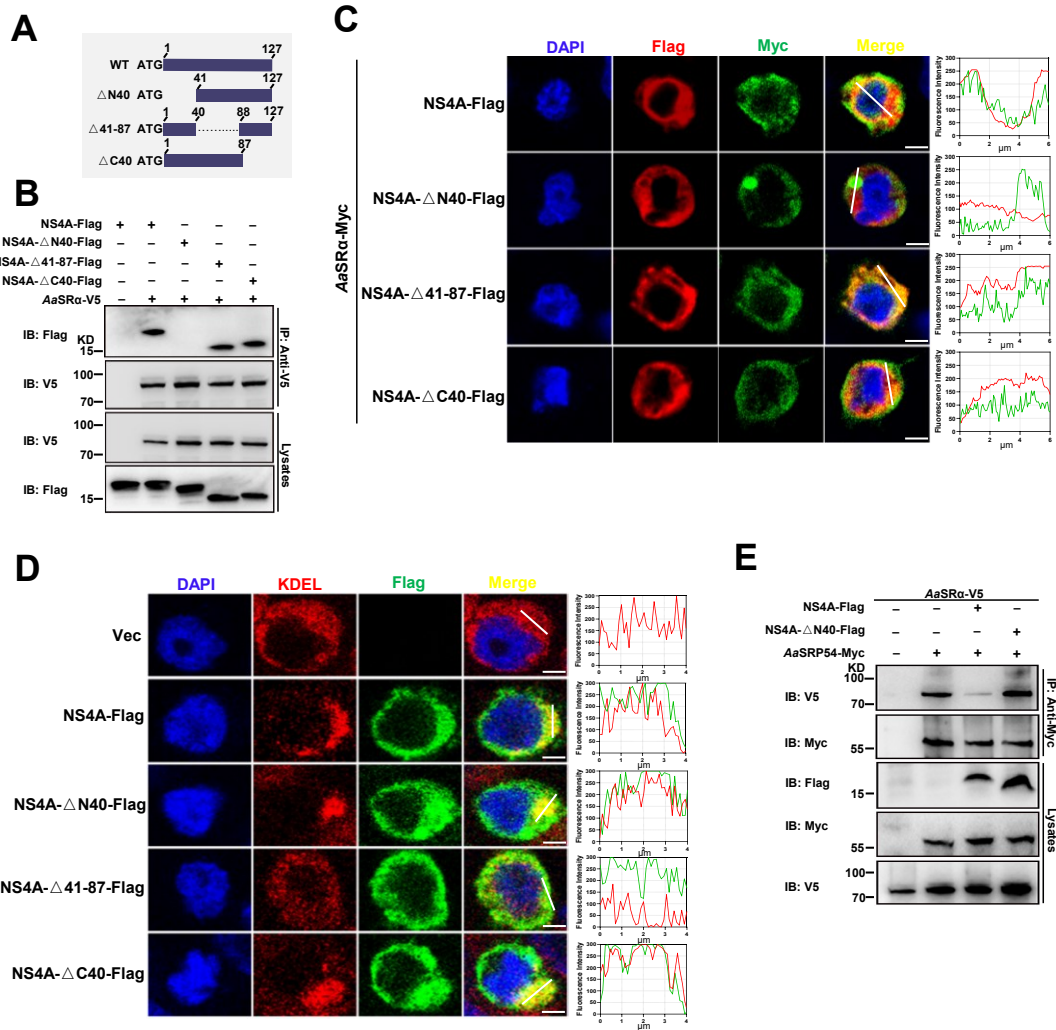

**Fig. S9. The N-terminal 40 amino acids of NS4A are indispensable for the interaction with *AaSRα*.**

(A) Schematic of NS4A truncations. (B) The N-terminal 40 amino acids of NS4A mediated the interaction with *AaSRα*. S2 cells were transfected with the indicated plasmids, and cell lysates were subjected to IP with anti-V5 antibodies and analyzed via WB. (C) NS4A-ΔN40 was unable to colocalize with *AaSRα*. C6/36 cells were transfected with the indicated plasmids and then harvested and fixed. NS4A/truncations and *AaSRα* were stained with Alexa Fluor 594-conjugated anti-mouse IgG and Alexa Fluor 488-conjugated anti-rabbit IgG, respectively. The nuclei were stained with DAPI and then analyzed via immunofluorescence assay. Scale bars, 3 μm. (D) The truncation of 41-87<sup>th</sup> residues abolished the colocalization of NS4A with ER. C6/36 cells were cultured overnight, and then were transfected with indicated plasmids. After 48 hours transfection, cells were fixed and incubated with anti-Flag and anti-KDEL antibodies

overnight and then stained with Alexa Fluor 488-conjugated anti-rabbit IgG and Alexa Fluor 594-conjugated anti-mouse IgG. The nuclei were stained with DAPI and then analyzed via immunofluorescence assay. Scar bars, 3  $\mu\text{m}$ . **(E)** NS4A- $\Delta$ N40 did not compete with *AaSRP54* binding to *AaSR $\alpha$* . S2 cells were transfected with the indicated plasmids. IP was performed with anti-Myc antibodies and analyzed via WB. **(B, E)** These experiments were repeated three times with similar results.

**A**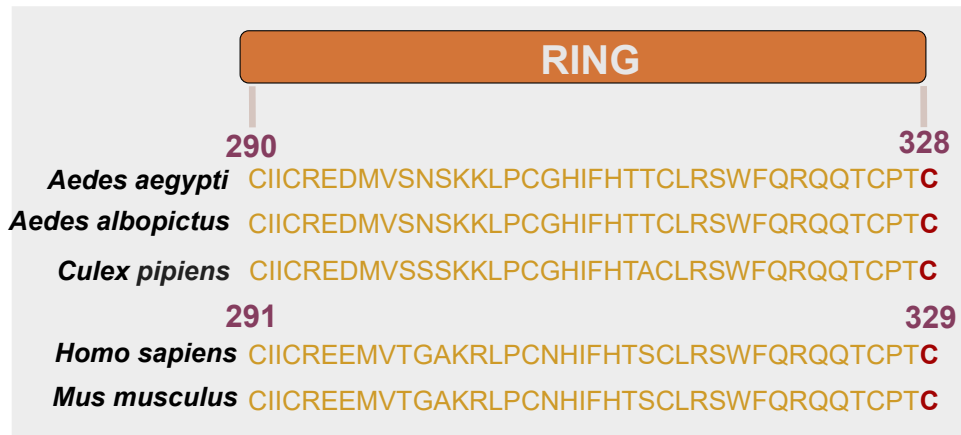**B**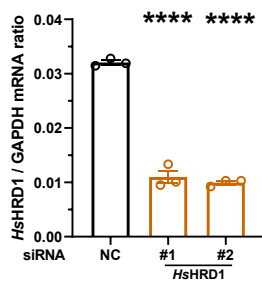**C**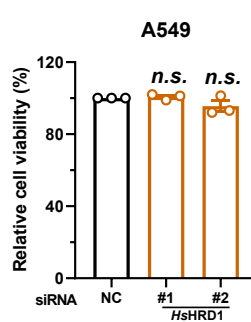**D**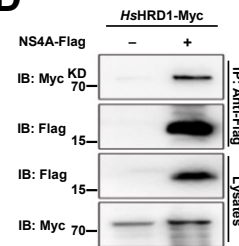**E**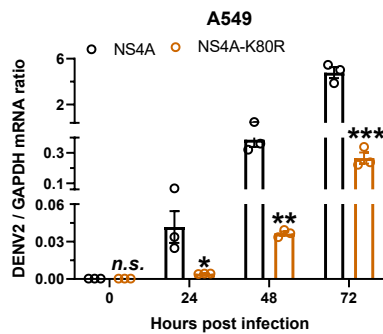

**Fig. S10. *HsHRD1* ubiquitylates DENV2 NS4A to facilitate flavivirus infection in hosts, related to Fig. 4.**

(A) Sequence alignment of HRD1s RING domain from different species. Sequence alignment of HRD1s RING domain from indicated species and catalytic centers are marked in red. (B) Identification of *HsHRD1* siRNA deficiency via qPCR. A549 cells were transfected with indicated siRNAs for 36 hours. Gene expression was measured via qPCR. (C) Silencing *HsHRD1* did not influence the cell viability. A549 cells were transfected with indicated siRNAs. After 48 hours transfection, cell viability was measured via CCK-8 Kit. Relative cell viability (%) = (Experiment value-black control value/negative control value-blank control value). (D) NS4A interacted with *HsHRD1*. HEK293T cells were transfected with indicated plasmids. IP

was performed with anti-Flag antibodies and analyzed via WB. **(E)** The K80R substitution in NS4A reduced DENV2 replication in A549 cells. A549 cells were infected with NS4A or NS4A-K80R strain at 0.1 MOI. Viral loads were measured at the indicated time via qPCR. **(D)** The experiment was repeated for three times with similar results. **(B, C, E)** Data are presented as the mean $\pm$ SEM and analyzed statistically using the unpaired t test. \*P < 0.05, \*\*P < 0.01, \*\*\*P < 0.001, \*\*\*\*P < 0.0001, *n.s.*, not significant (P > 0.05).

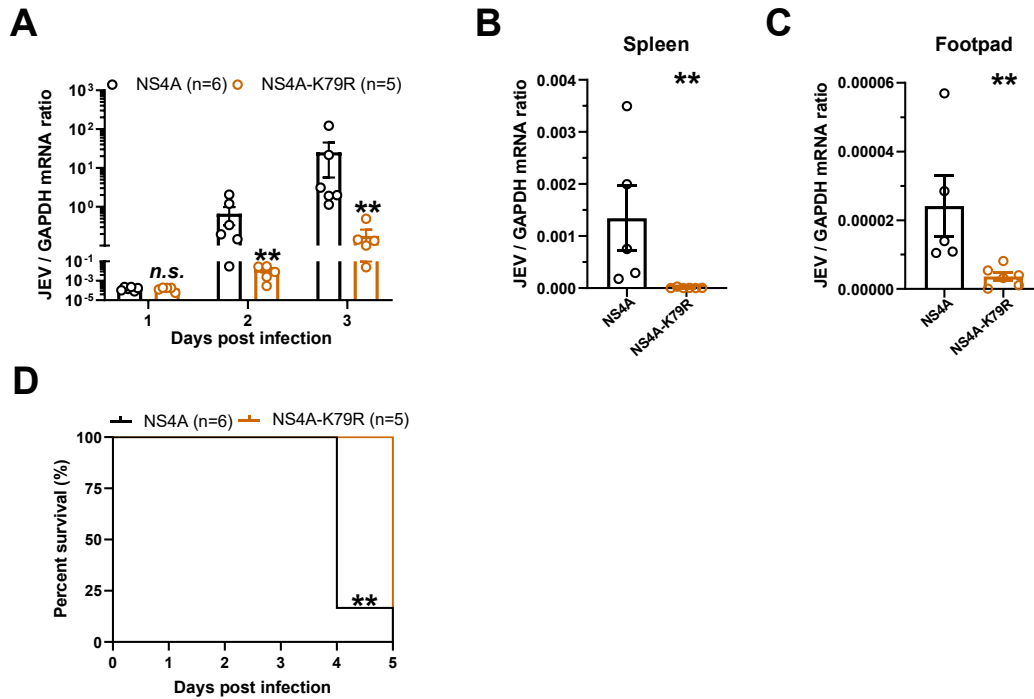

**Fig. S11. JEV-SA14-NS4A-K79R reduces the pathogenicity in AG6 mice.**

(A-D) The K79R substitution of NS4A reduced JEV replication in AG6 mice. Four-week-old male AG6 mice were infected with 20 f.f.u. of NS4A or NS4A-K79R strain by footpad inoculation. As JEV is highly pathogenic in AG6 mice, blood samples from Days 1 to 3 were collected for viremia assessment via qPCR. The K79R substitution in the NS4A resulted in lower viral burdens in murine blood (A). Infected mice were euthanized at two days postinfection, and viral loads in tissues were determined by qPCR (B-C). The survival rates of the mice were recorded daily (D). (A, D) n=6 (NS4A) and n=5 (NS4A-K79R) biological replicates. (B, C) n=5 (NS4A) and n=6 (NS4A-K79R) biological replicates. (A-C) Data are presented as the mean±SEM and were analyzed statistically using the Mann–Whitney test. (D) The data were analyzed statistically using the log-rank (Mantel–Cox) test. \*P < 0.05, \*\*P < 0.01, \*\*\*P < 0.001, \*\*\*\*P < 0.0001, n.s., not significant (P > 0.05).



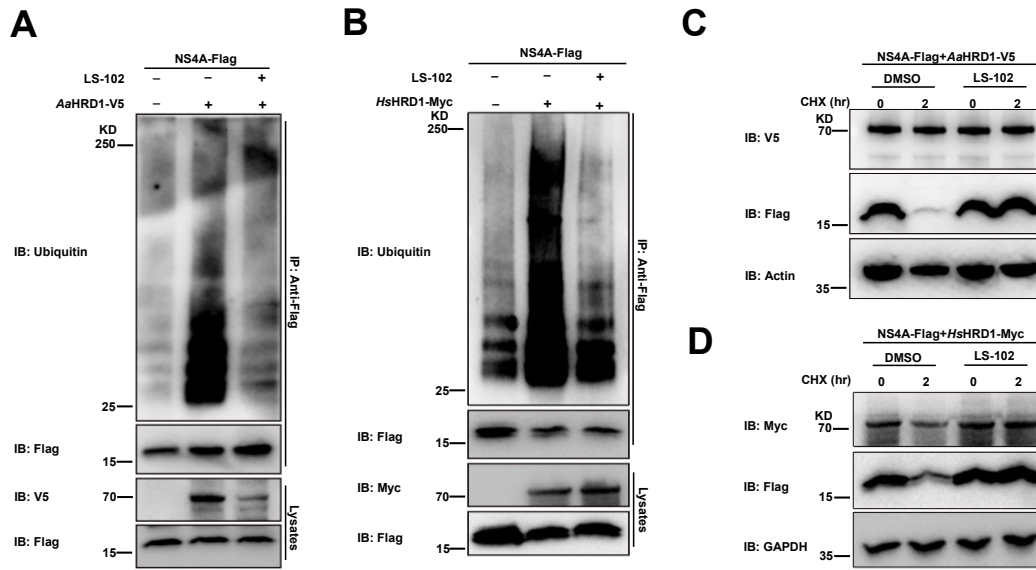

**Fig. S12. LS-102 inhibits the ubiquitination and instability of DENV2 NS4A mediated by HRD1s.**

(A, B) LS-102 inhibited the ubiquitination of NS4A mediated by *AaHRD1* or *HsHRD1*. S2 cells were transfected with the indicated plasmids and then incubated with LS-102 (20  $\mu$ M) (A). The indicated plasmids were cotransfected into HEK293T cells. Subsequently, cells were treated with LS-102 (10  $\mu$ M) (B). The level of NS4A ubiquitination was measured at 48 hours posttransfection by IP with anti-Flag antibodies and then analyzed via WB. (C, D) LS-102 offset the instability of NS4A mediated by *AaHRD1* or *HsHRD1*. S2 cells were transfected with NS4A and *AaHRD1* and then incubated with LS-102 (20  $\mu$ M). Subsequently, the cells were treated with CHX (10  $\mu$ g/ml) for the indicated time. Cells were harvested, and the amount of NS4A was analyzed via WB (C). The indicated plasmids were transfected into HEK293T cells. Cells were incubated with LS-102 (10  $\mu$ M), followed by treatment with CHX (10  $\mu$ g/ml) for the indicated time. The expression of NS4A was analyzed via WB (D). (A-D) These experiments were repeated three times with similar results.

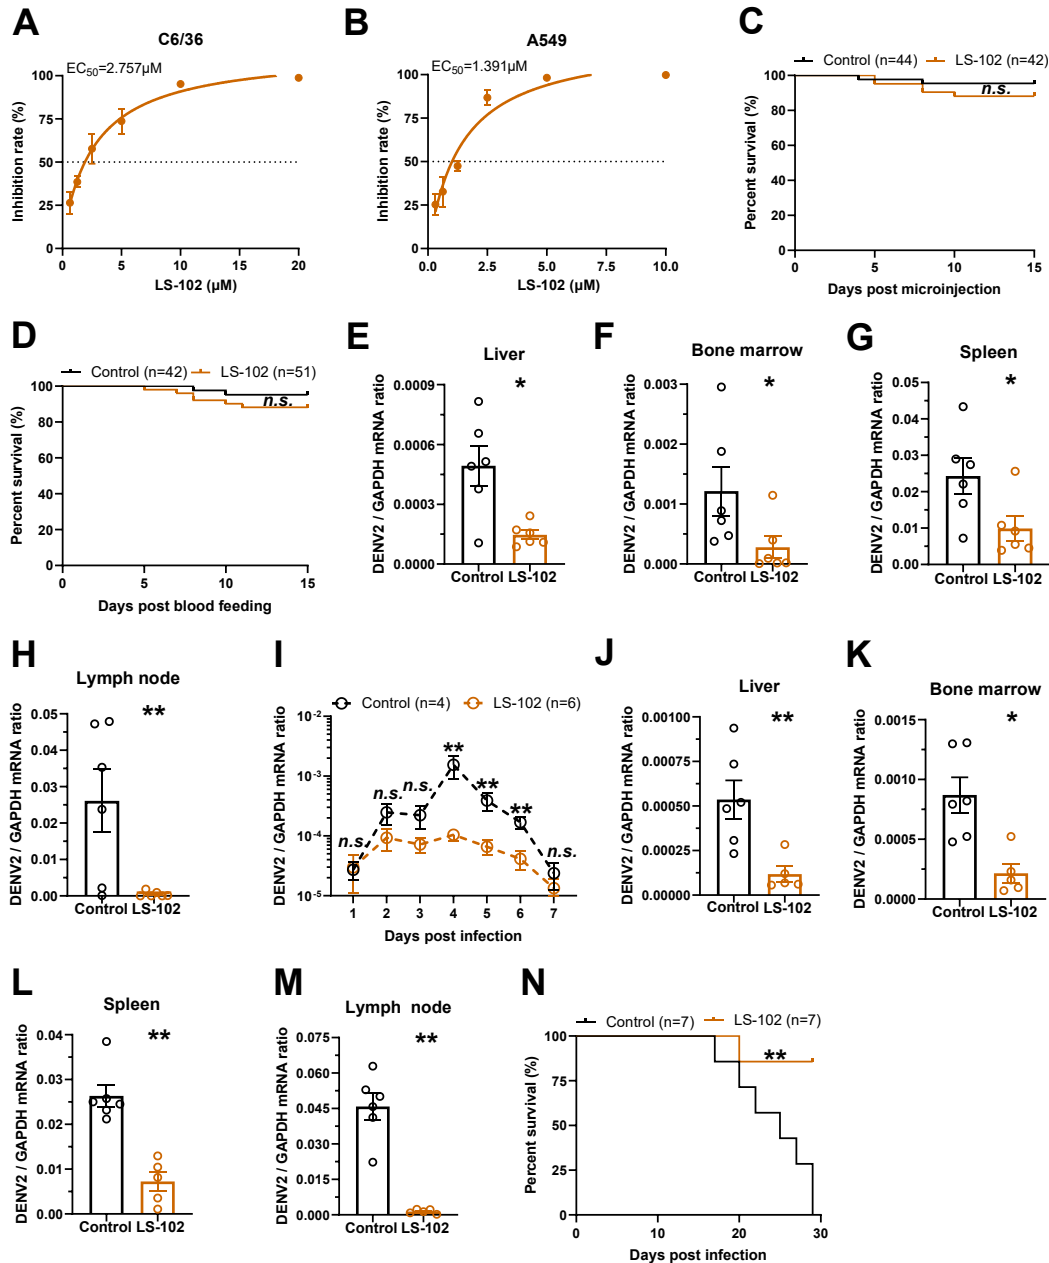

**Fig. S13. LS-102 inhibits DENV2 infection in hosts and mosquitoes, related to Fig. 5.**

(A, B) Quantification of the  $EC_{50}$  of LS-102 in C6/36 cells and A549 cells. C6/36 or A549 cells were infected with DENV2 at 0.1 MOI and simultaneously treated with the indicated concentration of LS-102 for 48 hours. Viral yield in cell supernatant were quantified by qRT-PCR [% inhibition rate= $[1-(\text{viral copies of treatment group}/\text{viral RNA copies of control group})] \times 100\%$ ]. The values of the concentration for 50% of maximal effect ( $EC_{50}$ ) of LS-102 are shown above each plot and indicated with the black dashed line. (C, D) The survival rates of mosquitoes were recorded daily after microinjection or oral feeding with LS-102. Per female

mosquito aged 7 days was inoculated with 70 ng LS-102 and then maintained to record survival rates (C). LS-102 mixed with human blood were used to feed mosquitoes via an *in vitro* blood feeding system. The final concentration of LS-102 for feeding was 240  $\mu\text{g ml}^{-1}$ . The survival rates were recorded daily (D). (E-H) LS-102 reduced viral loads in AG6 tissues. Four-week-old female AG6 mice were infected with  $5 \times 10^4$  f.f.u. of the DENV2 16681 strain by footpad inoculation and intraperitoneally inoculated with LS-102 (15 mg/kg) dissolved in corn oil every day postinfection. Infected mice were euthanized at two days postinfection, and viral loads in tissues were measured via qPCR. (I-N) The prophylactic effect of LS-102 in DENV2 infection. Three-week-old female AG6 mice were intraperitoneally inoculated with LS-102 (15 mg/kg) every day beginning 7 days before infection. After infection with the  $5 \times 10^4$  f.f.u DENV2 16681 strain, the animals were continuously treated daily with LS-102 (15 mg/kg). Blood samples were collected from infected mice for viremia assessment from Day 1 to Day 7 using qPCR (I). Infected mice were euthanized at two days postinfection, and viral loads in the liver (J), bone marrow (K), spleen (L) and lymph nodes (M) were measured via qPCR. (I-M) Data were combined with two independent experiments. The survival rates of mice were recorded daily (N). (A, B) Data are presented as the mean $\pm$ SEM and analyzed statistically using the unpaired t test. (C, D) The data were analyzed statistically using the log-rank (Mantel–Cox) test. (E-H) n=6 biological replicates. (I) n=4 (Control) and n=6 (LS-102) biological replicates. (J-M) n=6 (Control) and n=5 (LS-102) biological replicates. (N) n=7 biological replicates. (E-M) Data are presented as the mean $\pm$ SEM and were analyzed statistically using the Mann–Whitney test. (N) The data were analyzed statistically using the log-rank (Mantel–Cox) test. \*P < 0.05, \*\*P < 0.01, \*\*\*P < 0.001, \*\*\*\*P < 0.0001, *n.s.*, not significant (P > 0.05).

## Supplementary Table 1

**Table S1. The E3 ligases of *Aedes. Aegypti***

| Gene ID    | Gene name                                            | Type |
|------------|------------------------------------------------------|------|
| AAEL009509 | potential E3 ubiquitin-protein ligase ariadne-2      | RBR  |
| AAEL012490 | E3 ubiquitin-protein ligase RNF19B                   | RBR  |
| AAEL018318 | E3 ubiquitin-protein ligase parkin                   | RBR  |
| AAEL022272 | potential E3 ubiquitin-protein ligase ariadne-1-like | RBR  |
| AAEL023019 | potential E3 ubiquitin-protein ligase ariadne-1      | RBR  |
| AAEL001205 | E3 ubiquitin-protein ligase Su(dx)                   | HECT |
| AAEL002306 | probable E3 ubiquitin-protein ligase HERC2           | HECT |
| AAEL004790 | ubiquitin-protein ligase E3B                         | HECT |
| AAEL005774 | E3 ubiquitin-protein ligase HECW2                    | HECT |
| AAEL005820 | probable E3 ubiquitin-protein ligase HERC4           | HECT |
| AAEL005930 | E3 ubiquitin-protein ligase Hyd                      | HECT |
| AAEL006008 | apoptosis-resistant E3 ubiquitin protein ligase 1    | HECT |
| AAEL007705 | E3 ubiquitin-protein ligase HECTD1                   | HECT |
| AAEL008374 | E3 ubiquitin-protein ligase nedd-4                   | HECT |
| AAEL010256 | E3 ubiquitin-protein ligase SMURF2                   | HECT |
| AAEL011541 | ubiquitin-protein ligase E3C                         | HECT |
| AAEL012500 | ubiquitin-protein ligase E3A                         | HECT |
| AAEL017357 | E3 ubiquitin-protein ligase TRIP12                   | HECT |
| AAEL026428 | E3 ubiquitin-protein ligase TRIP12-like              | HECT |
| AAEL000424 | E3 ubiquitin-protein ligase RFWD2                    | RING |
| AAEL000523 | RING finger protein 44                               | RING |
| AAEL000570 | RING-box protein 2                                   | RING |
| AAEL000590 | E3 ubiquitin-protein ligase MYLIP                    | RING |
| AAEL000730 | E3 ubiquitin-protein ligase Bre1                     | RING |
| AAEL000763 | E3 ubiquitin-protein ligase SH3RF1                   | RING |
| AAEL000776 | E3 ubiquitin-protein ligase TRIM37                   | RING |
| AAEL001217 | tripartite motif-containing protein 45               | RING |

**Table S1. The E3 ligases of *Aedes. Aegypti***

| <b>Gene ID</b> | <b>Gene name</b>                                        | <b>Type</b> |
|----------------|---------------------------------------------------------|-------------|
| AAEL001357     | serine/arginine repetitive matrix protein 2             | RING        |
| AAEL001410     | E3 ubiquitin-protein ligase SHPRH                       | RING        |
| AAEL001459     | protein deltex                                          | RING        |
| AAEL001610     | RING finger protein 37                                  | RING        |
| AAEL001765     | E3 ubiquitin-protein ligase LRSAM1                      | RING        |
| AAEL001778     | RING finger protein 113A                                | RING        |
| AAEL001933     | uncharacterized protein                                 | RING        |
| AAEL002020     | RING finger protein 121                                 | RING        |
| AAEL002078     | RING finger protein 141                                 | RING        |
| AAEL002345     | E3 ubiquitin-protein ligase listerin                    | RING        |
| AAEL002642     | E3 ubiquitin-protein ligase TRIM9                       | RING        |
| AAEL002706     | E3 ubiquitin-protein ligase RBBP6                       | RING        |
| AAEL003009     | E3 ubiquitin-protein ligase RNF13                       | RING        |
| AAEL003010     | E3 ubiquitin-protein ligase TRIM39                      | RING        |
| AAEL003104     | RING finger protein nhl-1                               | RING        |
| AAEL003248     | probable E3 ubiquitin-protein ligase MGRN1              | RING        |
| AAEL003271     | E3 ubiquitin-protein ligase FANCL                       | RING        |
| AAEL003343     | RING finger and SPRY domain-containing protein 1        | RING        |
| AAEL003466     | E3 ubiquitin-protein ligase cullin-4A                   | RING        |
| AAEL003489     | E3 ubiquitin-protein ligase ZNF598                      | RING        |
| AAEL003680     | E3 ubiquitin-protein ligase rnf146                      | RING        |
| AAEL003787     | E3 ubiquitin-protein ligase TRAIIP                      | RING        |
| AAEL004044     | E3 ubiquitin-protein ligase highwire                    | RING        |
| AAEL004356     | E3 ubiquitin-protein ligase arkadia-B                   | RING        |
| AAEL004689     | cell growth regulator with RING finger domain protein 1 | RING        |
| AAEL004697     | E3 ubiquitin-protein ligase HRD1                        | RING        |
| AAEL004713     | E3 ubiquitin-protein ligase TRIM37                      | RING        |
| AAEL004861     | E3 ubiquitin-protein ligase RNF4                        | RING        |

**Table S1. The E3 ligases of *Aedes. Aegypti***

| <b>Gene ID</b> | <b>Gene name</b>                                            | <b>Type</b> |
|----------------|-------------------------------------------------------------|-------------|
| AAEL005040     | E3 ubiquitin-protein ligase siah-1                          | RING        |
| AAEL005267     | LON peptidase N-terminal domain and RING finger protein 2   | RING        |
| AAEL005288     | E3 ubiquitin-protein ligase KCMF1                           | RING        |
| AAEL005320     | E3 ubiquitin-protein ligase MIB2                            | RING        |
| AAEL005646     | RING finger and CHY zinc finger domain-containing protein 1 | RING        |
| AAEL005826     | E3 ubiquitin-protein ligase                                 | RING        |
| AAEL005874     | E3 ubiquitin-protein ligase AMFR                            | RING        |
| AAEL006550     | E3 ubiquitin-protein ligase RNF185                          | RING        |
| AAEL006589     | protein TRC8 homolog                                        | RING        |
| AAEL006839     | RING finger protein 3                                       | RING        |
| AAEL006929     | E3 ubiquitin-protein ligase cullin-2                        | RING        |
| AAEL007167     | E3 ubiquitin-protein ligase RNF4                            | RING        |
| AAEL007187     | E3 ubiquitin-protein ligase cullin-3                        | RING        |
| AAEL007227     | E3 ubiquitin-protein ligase RNF123                          | RING        |
| AAEL007353     | E3 ubiquitin-protein ligase cullin-5                        | RING        |
| AAEL007476     | probable E3 ubiquitin-protein ligase makorin-1              | RING        |
| AAEL007527     | tripartite motif-containing protein 2                       | RING        |
| AAEL007701     | putative E3 ubiquitin-protein ligase UBR7                   | RING        |
| AAEL007797     | E3 ubiquitin-protein ligase RNF220                          | RING        |
| AAEL008184     | E3 ubiquitin-protein ligase NRDP1                           | RING        |
| AAEL008683     | E3 ubiquitin-protein ligase Topors                          | RING        |
| AAEL008854     | RING finger protein 10                                      | RING        |
| AAEL009242     | E3 ubiquitin-protein ligase RFWD3                           | RING        |
| AAEL009614     | E3 ubiquitin-protein ligase sina                            | RING        |
| AAEL009739     | E3 ubiquitin-protein ligase CBL-B-B                         | RING        |
| AAEL009874     | E3 ubiquitin-protein ligase znrf2                           | RING        |
| AAEL010211     | polycomb protein Pcl                                        | RING        |
| AAEL010831     | mitochondrial ubiquitin ligase activator of nfkb 1-A        | RING        |

**Table S1. The E3 ligases of *Aedes. Aegypti***

| <b>Gene ID</b> | <b>Gene name</b>                                          | <b>Type</b> |
|----------------|-----------------------------------------------------------|-------------|
| AAEL011124     | G2/M phase-specific E3 ubiquitin-protein ligase           | RING        |
| AAEL011179     | ring finger protein 2                                     | RING        |
| AAEL011279     | zinc finger protein ubi-d4                                | RING        |
| AAEL011413     | E3 ubiquitin-protein ligase RNF25                         | RING        |
| AAEL011580     | E3 ubiquitin-protein ligase RNF181                        | RING        |
| AAEL011668     | RING finger and transmembrane domain-containing protein 2 | RING        |
| AAEL011927     | E3 ubiquitin-protein ligase mind-bomb                     | RING        |
| AAEL012105     | zinc finger protein-like 1 homolog                        | RING        |
| AAEL012209     | E3 ubiquitin-protein ligase RING1                         | RING        |
| AAEL012337     | protein goliath                                           | RING        |
| AAEL012428     | E3 ubiquitin-protein ligase TRIM37                        | RING        |
| AAEL012588     | E3 ubiquitin-protein ligase CHIP                          | RING        |
| AAEL012693     | E3 ubiquitin-protein ligase TRIM37                        | RING        |
| AAEL012941     | E3 ubiquitin-protein ligase MARCH5                        | RING        |
| AAEL013402     | E3 ubiquitin-protein ligase Mdm2                          | RING        |
| AAEL013530     | E3 ubiquitin-protein ligase cullin-1                      | RING        |
| AAEL013965     | E3 ubiquitin-protein ligase RNF126                        | RING        |
| AAEL014030     | roquin-1                                                  | RING        |
| AAEL014545     | RING finger protein unkempt                               | RING        |
| AAEL014744     | E3 ubiquitin-protein ligase TRAIP                         | RING        |
| AAEL017329     | B-box type zinc finger protein ncl-1                      | RING        |
| AAEL020680     | probable E3 ubiquitin protein ligase DRIPH                | RING        |
| AAEL021579     | E3 ubiquitin-protein ligase TRIM37                        | RING        |
| AAEL023117     | E3 ubiquitin-protein ligase MARCH6                        | RING        |
| AAEL023762     | E3 ubiquitin-protein ligase Mdm2-like                     | RING        |
| AAEL023913     | E3 ubiquitin-protein ligase MARCH3-like                   | RING        |
| AAEL027780     | E3 ubiquitin-protein ligase RNF181-like                   | RING        |

## Supplementary Table 2

**Table S2. The Sec61 translocon complex of *Aedes. aegypti***

| Gene ID    | Gene name                                                                 |
|------------|---------------------------------------------------------------------------|
| AAEL005856 | signal recognition particle receptor subunit alpha homolog (SR $\alpha$ ) |
| AAEL010716 | protein transport protein Sec61 subunit alpha (Sec61 $\alpha$ 1)          |
| AAEL004523 | protein transport protein Sec61 subunit alpha (Sec61 $\alpha$ 2)          |
| AAEL013989 | protein transport protein Sec61 subunit beta (Sec61 $\beta$ )             |
| AAEL005471 | protein transport protein Sec61 subunit gamma (Sec61 $\gamma$ )           |
| AAEL013226 | translocation protein Sec62(Sec62)                                        |
| AAEL013076 | signal recognition particle 54 kDa protein (SRP54)                        |



### Supplementary Table 3

**Table S3. Primers for dsRNA, siRNA synthesis, sequences for probes and qPCR**

| Primers for dsRNA synthesis |                                                     |                                                     | Primers for qPCR     |                      |
|-----------------------------|-----------------------------------------------------|-----------------------------------------------------|----------------------|----------------------|
| Gene ID                     | Upper primer                                        | Lower primer                                        | Upper primer (qPCR)  | Lower primer(qPCR)   |
| AAEL012490                  | TAATACGACTCACTATAGGGT<br>CGACCAGTCTGTCGTCTTCG       | TAATACGACTCACTATAGGGC<br>GTCCGGCTCGGTGATGTGCT       | CGTCATTGATGGCGGCAGTA | CGGCTACTTCCCAGACTAGC |
| AAEL023019                  | TAATACGACTCACTATAGGGA<br>CAGTGTCGGCTACTGAGGAA       | TAATACGACTCACTATAGGGC<br>CGATGCATAGAGTTTATGCT       | ACGAGAGCTTCGATGAGCAC | TCAGCACCTCAAACGGGTAG |
| AAEL018318                  | TAATACGACTCACTATAGGGC<br>TGTCTAGACTGCTTCCGCC        | TAATACGACTCACTATAGGGG<br>TTCGGTCCCGTTCGACACT        | TTCGCCGAAAGGAACTCTC  | CGGAGATTGGCGATTCCAGT |
| AAEL022272                  | TAATACGACTCACTATAGGGG<br>GAACCGCATGGTTCTTCT         | TAATACGACTCACTATAGGGT<br>TCCAAGTACTTCGGGACAGCT<br>T | AATGTAACCGATTGCTTCGC | GATCGTGCCAGTTTTCACCA |
| AAEL009509                  | TAATACGACTCACTATAGGGC<br>GGGACTGACTATCACGCTC        | TAATACGACTCACTATAGGGG<br>ACTTCTCGTTGATGCGGGT        | CCAAGGTGCTACTCCACGAG | CCGATGGGGCAGCTTTGATA |
| AAEL005930                  | TAATACGACTCACTATAGGGG<br>GTTCTCGAACATTAGAAATCG<br>T | TAATACGACTCACTATAGGGA<br>GCCGGATCCGTATTCTTTCT       | TCGGATGAACCGCAGGATT  | ATCAACTGGGGTGCGTCTTC |
| AAEL017357                  | TAATACGACTCACTATAGGGT<br>TCAGATCCGCACGACTACTA       | TAATACGACTCACTATAGGGG<br>CTTTATGGCTACTGCCCGTA       | AACCTCCAAAAGGCAGGAG  | TGCTTGCCACTTTCTCTGGT |
| AAEL012500                  | TAATACGACTCACTATAGGGC<br>ACCGCCGACCTATCTTTCA        | TAATACGACTCACTATAGGGT<br>AGTCGCCGTTCCGAATACAT       | GGGCAGTGCTAAGATTCCGT | ACTGCTGCCGCTAAGAGTTT |
| AAEL007705                  | TAATACGACTCACTATAGGGA<br>TACCTGCCAACCAAGCTCGA       | TAATACGACTCACTATAGGGC<br>ACCAACTTCCACCGAATCGA       | GGCCTCCAAAGTCATGAGCA | GGAGGAAACGGTTAAGGGCA |
| AAEL004790                  | TAATACGACTCACTATAGGGC<br>TACATGGCGTACTTCCGCA        | TAATACGACTCACTATAGGGC<br>GAACCCACGGTGTGCCTAT        | GAAGCCAGGCATGCTTCAAC | GACCGTTCGACAGGTTCTT  |
| AAEL008374                  | TAATACGACTCACTATAGGGA<br>AATGGTCTATCCCCGTCGC        | TAATACGACTCACTATAGGGC<br>CGCCGCTTTGGTATAATG         | CAGTAACGATCCCAGCGACA | CGATCGATCCAACCGGACAT |
| AAEL002306                  | TAATACGACTCACTATAGGGG<br>AGAGTGCCAGCTCGGATAC        | TAATACGACTCACTATAGGGT<br>CGTTCAAATGCCATTCCAC        | CGCTGCCAGAAAACGAAACA | TTGGTCGAGTAGTTTCCCGC |
| AAEL005820                  | TAATACGACTCACTATAGGGA<br>CGTACTTCTCGCTGTGCAA        | TAATACGACTCACTATAGGGA<br>CATGCCATACTGGGATCCA        | ATCGAACTCGATCGGTCAGC | AGCGATCTGAACCACCGTTT |

**Table S3. Primers for dsRNA, siRNA synthesis, sequences for probes and qPCR**

| Primers for dsRNA synthesis |                                               |                                               | Primers for qPCR     |                       |
|-----------------------------|-----------------------------------------------|-----------------------------------------------|----------------------|-----------------------|
| Gene ID                     | Upper primer                                  | Lower primer                                  | Upper primer (qPCR)  | Lower primer(qPCR)    |
| AAEL005774                  | TAATACGACTCACTATAGGGT<br>GCTGGAAGATGCCTTCCGCC | TAATACGACTCACTATAGGGC<br>CGATGTCGTTGTCCCGTAT  | GAACTTGAAGGGGCTGTTGG | ATTCAGGTGGCTCGTCTTCG  |
| AAEL010256                  | TAATACGACTCACTATAGGGC<br>CTCAACAGCCAGCTCTCAA  | TAATACGACTCACTATAGGGA<br>GTTTCGATTGTTGTGATCTA | GTACCTGGGCAAGAACGACA | TCTTTGAGCCGCTGGATTGT  |
| AAEL011541                  | TAATACGACTCACTATAGGGA<br>TCACTCCAGCTGATGGCCG  | TAATACGACTCACTATAGGGC<br>TGTATGCAAAAACGGTGGAT | GTCGGACCGCTTGACCATAA | CTGGACAAAACCTGCGAACCG |
| AAEL026428                  | TAATACGACTCACTATAGGGT<br>TCAGATCCGCACGACTACTA | TAATACGACTCACTATAGGGG<br>CTTTATGGCTACTGCCCGTA | AACCTCCCAAAAGGCAGGAG | TGCTTGCCACTTCTCTGGT   |
| AAEL006008                  | TAATACGACTCACTATAGGGC<br>CTCAACAGCCAGCTCTCAA  | TAATACGACTCACTATAGGGA<br>GTTTCGATTGTTGTGATCTA | GTACCTGGGCAAGAACGACA | TCTTTGAGCCGCTGGATTGT  |
| AAEL001205                  | TAATACGACTCACTATAGGGT<br>GCAGATCAATCCCGCAAGT  | TAATACGACTCACTATAGGGC<br>TCCAAAGGCACCACCTCAT  | AGCCAAATCCGTACGTGGAG | GACACAATCACCGTGAAGCG  |
| AAEL008184                  | TAATACGACTCACTATAGGGT<br>GATTCCAAGGACGAGTACA  | TAATACGACTCACTATAGGGC<br>AATTCTCCATCAGGTCGTCG | AATTTGCTCTCCCGGCTGAA | CTCGCACTCCTCGATATGGG  |
| AAEL012209                  | TAATACGACTCACTATAGGGC<br>GAATCCTCCATCGGTCAGG  | TAATACGACTCACTATAGGGT<br>GCAGAAATTCACCAGACGAT | AGATTGCTGTATCACCCCGC | TGCAGTCGGAACAAAACCGA  |
| AAEL002706                  | TAATACGACTCACTATAGGGG<br>ATAATGCAGAGCGTTCCGTT | TAATACGACTCACTATAGGGC<br>TCCTCGCAATCTTTTCACTT | AAGCGACTCGGGAAAACGA  | GGGGGCATTCTTCAACGGTA  |
| AAEL006550                  | TAATACGACTCACTATAGGGT<br>CGAGGATGCCACGGAAGACG | TAATACGACTCACTATAGGGT<br>CGCCAAAGTTGAGTGTCGA  | CGGCTCCAGTTTGGAAGAT  | AACTGCCCCGTATCCGATTCC |
| AAEL021579                  | TAATACGACTCACTATAGGGT<br>AACACGAACCGAACGAATGC | TAATACGACTCACTATAGGGC<br>TGTTATTCTCGTTACGATCG | GCAAGCAATCCTTCGTCAGG | CCAGCGGGAAATGCAAAGAT  |
| AAEL002642                  | TAATACGACTCACTATAGGGT<br>ACGTTCTGGAGCTGGACGAC | TAATACGACTCACTATAGGGC<br>AGCATTTATCTCGGGCTAC  | ATCAGGAGGTGACGAATGCC | GGTGCCAGGGGAAGTTTCAT  |
| AAEL000424                  | TAATACGACTCACTATAGGGT<br>CCGAAAAGTTCGTGCCACT  | TAATACGACTCACTATAGGGG<br>TCTGAGATGGATCGGGTTGC | GAAAGCGAACCGATTCCAGC | TTACGTTGACGTCCGACAGG  |
| AAEL005826                  | TAATACGACTCACTATAGGGT<br>CATTGTGCGGGGTTCTTCA  | TAATACGACTCACTATAGGGA<br>ACGAAGCCGTGGCAGCAGCC | AATGTCCAGGATGTGCCAG  | TCGCTTCCAGCGTGTAGTTT  |

**Table S3. Primers for dsRNA, siRNA synthesis, sequences for probes and qPCR**

| Primers for dsRNA synthesis |                                                |                                                    | Primers for qPCR       |                             |
|-----------------------------|------------------------------------------------|----------------------------------------------------|------------------------|-----------------------------|
| Gene ID                     | Upper primer                                   | Lower primer                                       | Upper primer (qPCR)    | Lower primer(qPCR)          |
| AAEL005040                  | TAATACGACTCACTATAGGGA<br>TTCGAATGCCGATAGCCGT   | TAATACGACTCACTATAGGGT<br>CCTGGGACGAGCCGGATATA      | CGTGCGTGGACGAAAAGAAC   | AGTGCATCCGGATTGCTTGA        |
| AAEL013530                  | TAATACGACTCACTATAGGGA<br>AGCGTCGATGATTTCCAAAC  | TAATACGACTCACTATAGGGG<br>GTATTCTCACTCAACTGTTG      | AACGTGAGTGCGAAGAAGGT   | TGGTTTCCCATTACGCTCC         |
| AAEL006929                  | TAATACGACTCACTATAGGGG<br>GCAAAAACGACTCATCCACG  | TAATACGACTCACTATAGGGT<br>GGCATAAGATGATTCAACCAG     | CACCCGATTCCGCCTAATGA   | CTGCGATGCACTGCAGTTTT        |
| AAEL007187                  | TAATACGACTCACTATAGGGA<br>GACCCTGAACCAATCGTGGA  | TAATACGACTCACTATAGGGC<br>TCGGTGATACGTGCCTCAAC      | TCGTGCGAACACCCAAATCA   | ATGATACAATTTGAAGCGTG<br>ACA |
| AAEL003466                  | TAATACGACTCACTATAGGGG<br>GCGGAACTGATAGCCAAGT   | TAATACGACTCACTATAGGGC<br>AGCTCTGGGGCAGTGTGAC       | GTACCAAGCCGTGGAGAACA   | TTATCGACCGACTCGGCAAG        |
| AAEL007353                  | TAATACGACTCACTATAGGGA<br>CTACATCCCCGAGGTGGAA   | TAATACGACTCACTATAGGGT<br>TGTAACCGTCCGACCAGATT      | CATTCGATTTCGAGCTGGTG   | CGCGGACGTAGCTTGTAGAT        |
| AAEL001765                  | TAATACGACTCACTATAGGGG<br>GTCTGGTGGAACAGGTGAG   | TAATACGACTCACTATAGGGT<br>CAAGATAGCGGCACGATCC       | TGTCTGGCGAAAGAGACACC   | ACTCCTTCCGCAGAACCTTG        |
| AAEL005320                  | TAATACGACTCACTATAGGGA<br>TAACCAGGACGGTGGACCA   | TAATACGACTCACTATAGGGT<br>TGGCACAACCCTCATACTG       | GTGCGAAATAGGACTTCCG    | TCTGGTACCCGACCCGATAA        |
| AAEL003271                  | TAATACGACTCACTATAGGGA<br>GCACGTGGCGTATCATCAA   | TAATACGACTCACTATAGGGC<br>ACGTTCCAACGGATATGGC       | AAGCGCGATCATGGCTGTAA   | TGTCCGATATGCGCACCATT        |
| AAEL005874                  | TAATACGACTCACTATAGGGA<br>GCACGTGGCGTATCATCAA   | TAATACGACTCACTATAGGGC<br>ACGTTCCAACGGATATGGC       | AAGCGCGATCATGGCTGTAA   | TGTCCGATATGCGCACCATT        |
| AAEL014744                  | TAATACGACTCACTATAGGGG<br>TGCTGAACACACCCGATCA   | TAATACGACTCACTATAGGG<br>AGCTGTCCAAATCAAGTTCCA<br>G | CCGATATATTCGTGTCGTCGGA | TTTGTTTCGACACTCCGGGC        |
| AAEL003787                  | TAATACGACTCACTATAGGGA<br>GATGTACCGACTGCAATGTGA | TAATACGACTCACTATAGGGT<br>CCCTCGTTTGATGGTCACG       | TGTGTTTCCTTCATCGGTGG   | ATTTGCTTCGACACTCCGGG        |
| AAEL000776                  | TAATACGACTCACTATAGGG<br>ATAGCACCGGTGAAGGAAGC   | TAATACGACTCACTATAGGG<br>GTCCATACACCGGACCAAGG       | AATTTCTGCGCATTCCGTCG   | GATGGGGTGTTCACGCTTA         |
| AAEL012428                  | TAATACGACTCACTATAGGG<br>CAGGAGGCCCATCTTTGTCC   | TAATACGACTCACTATAGGG<br>TTTCGGTCCATCAGGGTTCC       | CAGCAGGAAATGGAGCAAGC   | ACAGTGCGGACAAAGATGGG        |

**Table S3. Primers for dsRNA, siRNA synthesis, sequences for probes and qPCR**

| Primers for dsRNA synthesis |                                               |                                               | Primers for qPCR           |                            |
|-----------------------------|-----------------------------------------------|-----------------------------------------------|----------------------------|----------------------------|
| Gene ID                     | Upper primer                                  | Lower primer                                  | Upper primer (qPCR)        | Lower primer(qPCR)         |
| AAEL004713                  | TAATACGACTCACTATAGGGT<br>CGGTCTCTGGCATGTCAAC  | TAATACGACTCACTATAGGGC<br>CCAGTGGCTGACAAAATGC  | CAGCTTGCCGGCACTTATTC       | GCGCAAAAGCAATCCAGACA       |
| AAEL012693                  | TAATACGACTCACTATAGGGC<br>AGCCGGTCGCAGTTATTG   | TAATACGACTCACTATAGGGC<br>GTCCAGGATGGTCTTCAGG  | CAAAGTGAAGACCCGCATC        | TTGGACAATTCATGCGCTGC       |
| AAEL003010                  | TAATACGACTCACTATAGGGT<br>CCATCCTGTTGGAGTGTCG  | TAATACGACTCACTATAGGGG<br>ACGCATCTCTGGGCTCATC  | GGAGGACTCCAGACTCTCCA       | CATTCCCGACAAAAGGGCTG       |
| AAEL001410                  | TAATACGACTCACTATAGGGA<br>TCGCCCAGGAATCATGGAAA | TAATACGACTCACTATAGGGT<br>CCTCTCCGGGGTTGAGAAT  | TCTGAGTTTGTTCCTCCGGC       | GTCGTTCCAGCTCCTCGAAA       |
| AAEL000763                  | TAATACGACTCACTATAGGGC<br>AACTGCACAACCCGGTCAAG | TAATACGACTCACTATAGGGG<br>CCGCATGTTTTGAGGGAAAG | GCAGCAAAATCACCCAAGC        | TCTAGCGCGCATTTCCTGCGA<br>T |
| AAEL013402                  | TAATACGACTCACTATAGGGA<br>GAGCCAGAAGGATTACCG   | TAATACGACTCACTATAGGGT<br>TCCAAACTTTCATGGCGCA  | TGCAGCAGTGAAGTAGCAGA       | TCTAGCACTCGGTTTGGACT       |
| AAEL004044                  | TAATACGACTCACTATAGGGC<br>GCCATCGCTGAGTTATCT   | TAATACGACTCACTATAGGGC<br>GGAATCCAGCATCCCTT    | CCGAACTGTATCGTTCCGA        | GATGAATCCCGGTACCGTCC       |
| AAEL023117                  | TAATACGACTCACTATAGGGT<br>CGAGGTATTGCTGTGGCAG  | TAATACGACTCACTATAGGGT<br>CGAATGGGCGATCACGTAG  | CCACTGTTCCATCCCTGCAT       | CGGCATATCCGGCGAATAGA       |
| AAEL012941                  | TAATACGACTCACTATAGGGG<br>CTTGCTGTTGCCGATTTCA  | TAATACGACTCACTATAGGGA<br>TGAAACACGTCTCCCTCCG  | CGAGAAGCAGAAGGGGAACA       | CCGTCAGGAAGGGGCTAATC       |
| AAEL009614                  | TAATACGACTCACTATAGGGA<br>TTTCATCGGTCGGAGCAGG  | TAATACGACTCACTATAGGGT<br>GACTGTAGAATCGGCGG    | GAACACGAGGAAGCCTGTGA       | CGCGATGGAGGTATCGAACA       |
| AAEL009739                  | TAATACGACTCACTATAGGGA<br>ATGAAAAGCAAAGCCCGCA  | TAATACGACTCACTATAGGGA<br>GCGACGTTGGTTGTGTCT   | AAGGCACCGAGCAAATCGTA       | TGGAGTGACGAGGTTGCAAT<br>A  |
| AAEL000590                  | TAATACGACTCACTATAGGGT<br>TGAATGGCTACGGCGAAGA  | TAATACGACTCACTATAGGGC<br>TGGCTTGTGGACATTCT    | GAGTCCAGTGTGTGACCCCA<br>AG | TCAACTTCTGCACCGTCTCC       |
| AAEL008683                  | TAATACGACTCACTATAGGGT<br>GATCACCAGCACGGACTTC  | TAATACGACTCACTATAGGGT<br>CAAAGTCCACCTCGGCTC   | TCGACTTCGCTGCTTGACAT       | CCGAGACAGATGGCAACTT        |
| AAEL012588                  | TAATACGACTCACTATAGGG<br>AACGCTGGAACATCCAGGAG  | TAATACGACTCACTATAGGGG<br>TTCTCTGCCAGGAAGGCAT  | GAAAGACCAGGGCAATCGGA       | TTGATGTGACACAGAGCCCG       |

**Table S3. Primers for dsRNA, siRNA synthesis, sequences for probes and qPCR**

| Primers for dsRNA synthesis |                                              |                                                | Primers for qPCR          |                             |
|-----------------------------|----------------------------------------------|------------------------------------------------|---------------------------|-----------------------------|
| Gene ID                     | Upper primer                                 | Lower primer                                   | Upper primer (qPCR)       | Lower primer(qPCR)          |
| AAEL009242                  | TAATACGACTCACTATAGGGC<br>GACTGAACGTGGATGGTC  | TAATACGACTCACTATAGGGC<br>ACGCGACATTTGCTATCCG   | GTTGCCAGAACCACTACGGA      | CTTCCTCGACCGGAACCAAA        |
| AAEL001217                  | TAATACGACTCACTATAGGG<br>CCATCGACTTTGCCGAGGAG | TAATACGACTCACTATAGGGA<br>CCATCAGGCTCATCACACC   | AGGCGCTGCTAAAACAAATC<br>G | ATGGCTGTGCGTGCATTTTG        |
| AAEL023762                  | TAATACGACTCACTATAGGGC<br>ATCCGCATCTGAATTCGCC | TAATACGACTCACTATAGGGT<br>TCGCTTCTGCGTTATTTTGCT | GGATGACTACTCGTCGGATGT     | AATGGCGAATTCAGATGCGG        |
| AAEL003489                  | TAATACGACTCACTATAGGG<br>GAACTCAGTGGCCAGGAACA | TAATACGACTCACTATAGGG<br>GTAGTGC GACTGGAAGTGCT  | GTCAAGCATTCTTCGCCGTC      | AGCACTCGAAGCAACACAGA        |
| AAEL000730                  | TAATACGACTCACTATAGGG<br>ATGGAAGTTACGGGACAGGC | TAATACGACTCACTATAGGG<br>AGAGAGCTCGTCTTTTCGGC   | CGATGCCGTGCTAAATGTGG      | CGAGGTGGTGGTGACCTCGTT<br>TT |
| AAEL003248                  | TAATACGACTCACTATAGGGC<br>GAGAAAACCCAGCTTCCCA | TAATACGACTCACTATAGGGT<br>GACCGTTACATGAGTGGGC   | CCGTTTCCCTATCCACCACC      | ATTGCAATCCGAGGCCTTCA        |
| AAEL011124                  | TAATACGACTCACTATAGGGA<br>AATCAGTTTGAAGGAGTTG | TAATACGACTCACTATAGGGC<br>CAGCAGTTTCAGCTTGAAC   | AGACCGCCTCGAAAAGACT       | GAAGGCGCCACTTTTTGTGG        |
| AAEL020680                  | TAATACGACTCACTATAGGGT<br>GACGGAATCGGAATGTCC  | TAATACGACTCACTATAGGGT<br>GACGGAATCGGAATGTCC    | ATGATTACCAATGCATCGA       | CGTGAACATCGTGGAACTCT        |
| AAEL007476                  | TAATACGACTCACTATAGGGT<br>GGACAAGGAACAACAGCGA | TAATACGACTCACTATAGGGG<br>TCGACCAGCGTACCATCTG   | GCTGGTCCCTCGTCTTCTTC      | TAGCGACAGGTGCCCATTTT        |
| AAEL007701                  | TAATACGACTCACTATAGGGG<br>AAGGTGAATCCGGTGCCTA | TAATACGACTCACTATAGGGA<br>CGGCAAAAATGCGAAGGAG   | CATGCCGGAATCTCGAGTGA      | GCATGCGTTTTCTCCACAG         |
| AAEL002078                  | TAATACGACTCACTATAGGGC<br>GGATTTAGCCCAACAAACG | TAATACGACTCACTATAGGGA<br>CGCTCATCGACAGACAACT   | TTGCCGAGAAGATCCTACC       | GAAGTCTCGTAGCTGAGGC         |
| AAEL007797                  | TAATACGACTCACTATAGGGG<br>CCGGACAGACAAGGATACG | TAATACGACTCACTATAGGGT<br>GTGCAGCCAACATTCTTCG   | AAACGGAGGACAACGTCTGC      | TCCCGTTACTACCGGAACCA        |
| AAEL003680                  | TAATACGACTCACTATAGGGA<br>AGGGTGTAGCCGTTTGTAG | TAATACGACTCACTATAGGGA<br>GGAGATCGGTCCACAACACG  | CAGAGCTGGAACCCCAAACT      | CAACCTGCGGGATGAATGC         |
| AAEL000523                  | TAATACGACTCACTATAGGGG<br>CCGTTCTCTCCTCACCATT | TAATACGACTCACTATAGGGG<br>CCGTTCTCTCCTCACCATT   | TTCTCGCCTCAAATGGCC        | TGGAGCTGGCCAGTGGAAATC       |

**Table S3. Primers for dsRNA, siRNA synthesis, sequences for probes and qPCR**

| Primers for dsRNA synthesis |                                               |                                               | Primers for qPCR      |                      |
|-----------------------------|-----------------------------------------------|-----------------------------------------------|-----------------------|----------------------|
| Gene ID                     | Upper primer                                  | Lower primer                                  | Upper primer (qPCR)   | Lower primer(qPCR)   |
| AAEL004861                  | TAATACGACTCACTATAGGGA<br>AAAGAACCTTCAGCCGCCA  | TAATACGACTCACTATAGGGA<br>CACATCGGACATTTCCGGC  | CGGAAGCTCTCCTAGCATCG  | ATTCGTTGCACTCTGGTGGA |
| AAEL001610                  | TAATACGACTCACTATAGGGG<br>CAGGAAGAGAAGTGGGGTC  | TAATACGACTCACTATAGGGG<br>ACTGACTTAGCGCTTGTGC  | GGTCGATTGCGATGCTGTTG  | CTTCGTTACCGAGTACGCCA |
| AAEL008854                  | TAATACGACTCACTATAGGGA<br>ACGCCAGCTGGGTAAATCA  | TAATACGACTCACTATAGGGC<br>TCCAGTGCTGCCTCGATAG  | TCGCAGCTACGTCAAGAAGG  | ACTTGCTCGATCTTTGCCCA |
| AAEL027780                  | TAATACGACTCACTATAGGGA<br>CGTTGCATCGATATGTGGC  | TAATACGACTCACTATAGGGG<br>AGGCGTTTCTTCATCCGTC  | ACGGTCGATGAGGAACCATC  | TAGCTGTGGGAACACTCCAG |
| AAEL011413                  | TAATACGACTCACTATAGGGA<br>TCAATGCGCCCAAGTTTCG  | TAATACGACTCACTATAGGGG<br>AGAAGCCTCAACGACCTCC  | TTATCCGGAACAGTAGCGGC  | GACCCGGAAGCACCTGAAG  |
| AAEL003009                  | TAATACGACTCACTATAGGGC<br>GAGATGTTGGTTCCCCCTC  | TAATACGACTCACTATAGGGC<br>TGGTCGAGGGAAGATTGGG  | GCTGTCGAAAAGTGCCAAGG  | CTTGATGCCACTCTCGGGAA |
| AAEL007227                  | TAATACGACTCACTATAGGGT<br>GATCCTGACGATAACGCCG  | TAATACGACTCACTATAGGGC<br>GGATCGAAGTTACCCCTCG  | ACAGCTATGGCCTAGACGGA  | TCCATGTCTACGCACACACC |
| AAEL007167                  | TAATACGACTCACTATAGGGC<br>GCAGAATGTCGAGGTGCTA  | TAATACGACTCACTATAGGGG<br>CAGCTTGCTGGTGAAAAAT  | TCGTTCCCTAAACCGTGAGGC | CGTACCGGAATCATTGCGC  |
| AAEL011580                  | TAATACGACTCACTATAGGGT<br>GTTGATGGTTCGCTTTCTGC | TAATACGACTCACTATAGGGC<br>TCTTCGATCTCCTGTTCCCG | TTTGAAGAACTCGGCTGCGA  | CGTATCCGACCGGAACTCAT |
| AAEL002020                  | TAATACGACTCACTATAGGGT<br>CATGCACCGAATGTGTGGA  | TAATACGACTCACTATAGGGT<br>CCAATCGAGCAGTTGACCG  | CGAGCCGGTCGATATGTTCA  | ATGATGAGCGTCACCAGCAA |
| AAEL011668                  | TAATACGACTCACTATAGGGC<br>CGAGCGTGATCGAGTACAA  | TAATACGACTCACTATAGGGC<br>GTCAACGATCTTGCCCTA   | GTAGTAGAGTCGCCACCAGC  | TCTGTTGCTAACGGTGGCTT |
| AAEL013965                  | TAATACGACTCACTATAGGGT<br>CGACGAAGTCGTACGGAAG  | TAATACGACTCACTATAGGGG<br>ATACCTGTTGGTGCCGGAG  | CACTGCTCGGAAGGGTTCAT  | CACTGCTCGGAAGGGTTCAT |
| AAEL003104                  | TAATACGACTCACTATAGGGA<br>GAAGAAACCCACCCGTTTCG | TAATACGACTCACTATAGGGT<br>TCTTCGCGGGAGGTCTTTC  | ACTGAAGGCCCGTGTAACAG  | CCTGATCACTATCGGCCTCG |
| AAEL001778                  | TAATACGACTCACTATAGGGC<br>TACCGTGGAATGGCCAATC  | TAATACGACTCACTATAGGGC<br>ACACCGCAAATCGCACATC  | GCTAGGAAGCGCAAGCAATC  | GCTTTGCGCTGGTGCTTTAT |

**Table S3. Primers for dsRNA, siRNA synthesis, sequences for probes and qPCR**

| Primers for dsRNA synthesis |                                                    |                                                | Primers for qPCR      |                      |
|-----------------------------|----------------------------------------------------|------------------------------------------------|-----------------------|----------------------|
| Gene ID                     | Upper primer                                       | Lower primer                                   | Upper primer (qPCR)   | Lower primer(qPCR)   |
| AAEL006839                  | TAATACGACTCACTATAGGG<br>CTTTGACCGCACAAATGCAGG      | TAATACGACTCACTATAGGGC<br>GCGGTGATACTGTAGTCTT   | AAAGCTGCCTGGTGAACAC   | TTCCATCAGATTCGGCACCA |
| AAEL000570                  | TAATACGACTCACTATAGGGC<br>GACGTGAAACCGGACAAAAT<br>G | TAATACGACTCACTATAGGGG<br>AAAGATTCTTCCCTCCGGCGT | AATTCGACGACGTGAAACCG  | AATTCGACGACGTGAAACCG |
| AAEL012337                  | TAATACGACTCACTATAGGGA<br>GCACATTCCACAGCAGTCA       | TAATACGACTCACTATAGGGT<br>CTTGACTCGGTTTCGAGG    | CATCGAAGGAAGTCGCCACA  | GTAGAACCAGCCACACCA   |
| AAEL004356                  | TAATACGACTCACTATAGGGC<br>GGGTGTCTCCTCATCATGG       | TAATACGACTCACTATAGGGA<br>CGAAGCGGTTAAGCTGGA    | AACGACTCAAGCGGAACGAT  | CGGTACTCGTGATCGACTGG |
| AAEL009874                  | TAATACGACTCACTATAGGGA<br>GCGTAGGTAGGGTCTACG        | TAATACGACTCACTATAGGGG<br>GACAGCTGCGATTACCT     | AAATATCCTCCGCCAGTCCG  | CAATGACCAGATGTGTGCCG |
| AAEL004697                  | TAATACGACTCACTATAGGGC<br>TGTATCCTGACGCCACTCC       | TAATACGACTCACTATAGGGA<br>ATTCTTCGTGGTGAGCGT    | ACTCATCTCGTATGCATATCA | GTTCTCCAAGGAGTGTCGG  |
| AAEL011927                  | TAATACGACTCACTATAGGGG<br>AGTGCCTCCTTTGTTCCGA       | TAATACGACTCACTATAGGGC<br>GACGTTTCTGTGCCAATG    | CCAACCAGGTTACGATGGA   | ACCTCCTCTGGGACTCGAA  |
| AAEL005288                  | TAATACGACTCACTATAGGGC<br>TTCGCAGAGTCGGTCCAAA       | TAATACGACTCACTATAGGGA<br>TAGTGTGACCACGAGCACC   | GTCAACATTGTCCGCACTCG  | CGAAGAATTGTCCTCCGGG  |
| AAEL002345                  | TAATACGACTCACTATAGGGC<br>TGCCAGGACGAATTCCAGT       | TAATACGACTCACTATAGGGT<br>GTACAAAACAGGGTCCGTGG  | GCAAGTTGCGGGAAGTGTTT  | GCAAGTTGCGGGAAGTGTTT |
| AAEL005646                  | TAATACGACTCACTATAGGGG<br>GAAGTGGCTGCAACACCTA       | TAATACGACTCACTATAGGGC<br>TGGCAGCAGTAGACGGTAA   | GGACGGTACACTTGCTTGGT  | GTGGAAAATCGACCCCTGC  |
| AAEL003343                  | TAATACGACTCACTATAGGGC<br>GCTCGATGTCTCACGATCT       | TAATACGACTCACTATAGGGT<br>CTTGACGGTGCTAACGAT    | TAGTCGCGATTTCGTACACGG | CGGTATCCGACAACGATGCT |
| AAEL011279                  | TAATACGACTCACTATAGGGT<br>GACTCCCCAGACGAGTTCT       | TAATACGACTCACTATAGGGT<br>TCCGGTGGGGTCAAAGAG    | ACTCCGGATGCCATTTCTGG  | ATCGTGCCGAAGGGTAACTG |
| AAEL012105                  | TAATACGACTCACTATAGGGG<br>GCGAGAAACGTTCTTGAGC       | TAATACGACTCACTATAGGGT<br>GCGGCAGATTACGGTTGTA   | TTGTGCGGAAGTCCACTTGA  | GCCGGCAAGGATTGTTGTTT |
| AAEL014545                  | TAATACGACTCACTATAGGGC<br>TAGACGGAGGACGGCAGGA       | TAATACGACTCACTATAGGGT<br>CGCGTCATATCATACTCCG   | AGCATCCTCATTAGACGGCG  | TATGGAGTTTCCCATCGGAG |

**Table S3. Primers for dsRNA, siRNA synthesis, sequences for probes and qPCR**

| Primers for dsRNA synthesis       |                                              |                                              | Primers for qPCR      |                      |
|-----------------------------------|----------------------------------------------|----------------------------------------------|-----------------------|----------------------|
| Gene ID                           | Upper primer                                 | Lower primer                                 | Upper primer (qPCR)   | Lower primer(qPCR)   |
| AAEL005267                        | TAATACGACTCACTATAGGGC<br>GATGGCTGCTCAATTCTG  | TAATACGACTCACTATAGGGT<br>ATCGATGGCTCGAAGTCGC | GCCAGTAAGGGAAGTGGTCC  | TAAAACTAGGCTCGTGGCGG |
| AAEL001357                        | TAATACGACTCACTATAGGGC<br>GAAGGTGAAAGTGGAGCCT | TAATACGACTCACTATAGGGT<br>TGGCGTTGAATCGCTTTC  | CAACGGGAATGGAAGCGTTG  | TCGCTGCAATTCAGTCTCGT |
| AAEL023913                        | TAATACGACTCACTATAGGGC<br>GGTCCGGACTTACACACTG | TAATACGACTCACTATAGGGA<br>CGGGTCACTAGCATCGTC  | AGTGAAGAACCACAACGGCA  | GCACAGACAGGGCGAGATTA |
| AAEL014030                        | TAATACGACTCACTATAGGGG<br>CGGCGATTTGAAGATTCCC | TAATACGACTCACTATAGGGT<br>CGGATTCAAGACGGAGTGC | CGGATTACGGGTGCATCTCA  | CGACCAGGCCTATAACGACC |
| AAEL007527                        | TAATACGACTCACTATAGGGG<br>GGAATTGCCATAGGACCGA | TAATACGACTCACTATAGGGA<br>CGAAGCTTCCATTCGGGTT | TAGTTGGTGATGGCGGGAAC  | TAGTTGGTGATGGCGGGAAC |
| AAEL006589                        | TAATACGACTCACTATAGGGT<br>CGGCCAAAATTACGCGTTG | TAATACGACTCACTATAGGGC<br>TGCCACCGATGAGGGATT  | TCATAATGCGCGTCCCAAGT  | TCATAATGCGCGTCCCAAGT |
| AAEL010831                        | TAATACGACTCACTATAGGG<br>GAAGGGAATGCAAACGACCG | TAATACGACTCACTATAGGG<br>CGCAGTTTTCGCAGAGACAC | CGTCTTCTGGGTGTGGATG   | TTGCTAGTTGGGGTGCTTCC |
| AAEL011179                        | TAATACGACTCACTATAGGGA<br>AGCAGGGTCAGGTGTGATG | TAATACGACTCACTATAGGGT<br>GCATTCGCGGTGTTTGT   | ACAACCGGCAGTCGGATAAG  | CAGGACCGGCAAAATGTGTG |
| AAEL001933                        | TAATACGACTCACTATAGGGG<br>CCATCGGATGCAAACAACC | TAATACGACTCACTATAGGGG<br>GCGAGGGTAGCAGATTCTC | TCCCCTTCATCATGCACACC  | GATGAGCACACAGAGGGACC |
| AAEL001459                        | TAATACGACTCACTATAGGGA<br>TGCTCAACCCTGTCCGATG | TAATACGACTCACTATAGGGC<br>CAAAGGACCACATCCTCCC | TTCACCAGCTGGCAAAGGAA  | AGCTTCCTCGATCACGCATT |
| AAEL010211                        | TAATACGACTCACTATAGGGA<br>GCTTCTCGATCACGCATT  | TAATACGACTCACTATAGGGG<br>CGACGACTGGAGATCTGTT | GTTGGGAAAAGCTCACGCTG  | CTTCCGTTTCGTTGTGCTGG |
| AAEL017329                        | TAATACGACTCACTATAGGGC<br>GAGTGCCAAGTTTGTGGTG | TAATACGACTCACTATAGGGA<br>GTAGCAAGCCACGTGGAAA | GGCAGGGATCATTCCCCTAG  | GGCAGGGATCATTCCCCTAG |
| AAEL004689                        | TAATACGACTCACTATAGGGC<br>CCTGCCAACGTCCATACTT | TAATACGACTCACTATAGGGT<br>CATTCAATGCGTCCAGCCA | ACTACAGCCTCCAAGCATT   | GCTGTGAGGTTGTTGACACC |
| AAEL004697( <i>AaHRD1</i> dsRNA1) | TAATACGACTCACTATAGGGC<br>TGTATCCTGACGCCACTCC | TAATACGACTCACTATAGGGA<br>ATTCTTCGTCGGTGAGCGT | ACTCATCTCGTATGCATATCA | GTTCTCCAAGGAGTGTCCG  |



**Table S3. Primers for dsRNA, siRNA synthesis, sequences for probes and qPCR**

| Primers for dsRNA synthesis         |                                              |                                               | Primers for qPCR      |                       |
|-------------------------------------|----------------------------------------------|-----------------------------------------------|-----------------------|-----------------------|
| Gene ID                             | Upper primer                                 | Lower primer                                  | Upper primer (qPCR)   | Lower primer(qPCR)    |
| AAEL004697( <i>AaHRD1</i> dsRNA2)   | TAATACGACTCACTATAGGGT<br>GCATTCCGGCCCATGTATT | TAATACGACTCACTATAGGGA<br>AGTACTAATGGCGCTCCCG  | ACTCATCTCGTATGCATATCA | GTTCTCCAAGGAGTGTCGG   |
| AAEL004697( <i>AaHRD1</i> dsRNA3)   | TAATACGACTCACTATAGGGT<br>TGGGTTCAATCGCGTGTA  | TAATACGACTCACTATAGGGT<br>AGCATGCAATGGGGAAGCA  | ACTCATCTCGTATGCATATCA | GTTCTCCAAGGAGTGTCGG   |
| AAEL004514 ( <i>AaSel1L</i> )       | TAATACGACTCACTATAGGGA<br>CAACGCACAAGCGATGTTT | TAATACGACTCACTATAGGGT<br>GGCGTGGATTTCGTATTGCT | GAGTTGGAACCTCCACAGGG  | GTTCGAACCGTCCTCACCT   |
| AALC636_030691 ( <i>AablHRD1</i> )  | TAATACGACTCACTATAGGGG<br>CTGAACATTCTGCGAACCC | TAATACGACTCACTATAGGGG<br>AGGTAAACGGGCCACCAAT  | CCTCAAGTCGTTCCACTGGT  | CAATAGTCCAGCCACTCGCA  |
| AALC636_009275 ( <i>AablSel1L</i> ) | TAATACGACTCACTATAGGGT<br>AGGATGGCTTCGGAACAGC | TAATACGACTCACTATAGGGG<br>CCTCTCTCCGGCTACTC    | AGGGCGATGTACAAGCTCAG  | TTGGCCGCCTGACTGAAATA  |
| CPIJ003290( <i>CqHRD1</i> )         | TAATACGACTCACTATAGGGC<br>ATTTGCATCATCTGCCGGG | TAATACGACTCACTATAGGGG<br>CTCGTTACCTTCCATTGCG  | AGTCCAACCCAAGTATGGCG  | GCTCCATCAGGTGCTCGAAT  |
| AAEL005856                          | TAATACGACTCACTATAGGGG<br>GCGTGGGAAAGTCTACCAA | TAATACGACTCACTATAGGGT<br>TCACCAGCTGATCTACGGC  | TTACCAAGGGCGGAATCGTC  | CGTACACTCCAGATCGCTCC  |
| AAEL010716                          | TAATACGACTCACTATAGGGA<br>AAATTCCACGGCAACCTGC | TAATACGACTCACTATAGGGG<br>CTCTGCTCCTTGACGAAGA  | ACCCTGATGGAGCTGGGTAT  | TCCAAACAGTTTTTTCGGCCC |
| AAEL004523                          | TAATACGACTCACTATAGGGC<br>AACCTTCTCGGAGTGTGGG | TAATACGACTCACTATAGGGA<br>TGATGGTGACTGCCAGCAA  | ACTATGGACAGCCATCACGC  | TTCGAAGCCAGGATGACACG  |
| AAEL013989                          | TAATACGACTCACTATAGGGC<br>CGGAGTTCCAGCAATCTG  | TAATACGACTCACTATAGGGA<br>TCTTCCCGGAACGTACTCA  | GATCTCCCACAAAGCCCACA  | GTGTAGAAACGCCACATGCC  |
| AAEL005471                          | TAATACGACTCACTATAGGGA<br>TCGCCAAGATCTACGAGCC | TAATACGACTCACTATAGGGT<br>GGTTCTCAACGCATCTCGT  | TTTCTGTGCGCCGACGTTTA  | AATCGGATCGAGTCCTTGGC  |
| AAEL013226                          | TAATACGACTCACTATAGGGA<br>TCTTTGGTGCCTGTTGGT  | TAATACGACTCACTATAGGGT<br>TTTGCCCTTTCCTCGGTGT  | GGCTCAAATCGAATGTGCCG  | ACTTTGAAGCCATCAGGGCA  |

**The probes for Taqman qPCR**

| Gene ID                 | Upper primer (qPCR)  | Lower primer(qPCR)     | Probes                             |
|-------------------------|----------------------|------------------------|------------------------------------|
| <i>A. aegypti actin</i> | GAACACCCAGTCTGCTGACA | TGCGTCATCTTCTCACGGTTAG | 5'FAM-AGGCCCCGCTCAACCCGAAG-3'TAMRA |

|                                  |                                |                              |                                                   |
|----------------------------------|--------------------------------|------------------------------|---------------------------------------------------|
| <i>A. albopictus actin</i>       | CGGAAGAGCACCCAGTTCTC           | TGTGTCATCTTCTCGCGGTTAG       |                                                   |
| <i>C. quinquefasciatus actin</i> | AGTCCAACCCAAGTATGGCG           | GCTCCATCAGGTGCTCGAAT         |                                                   |
| DENV2                            | CATTCCAAGTGAGAATCTCTTTG<br>TCA | CAGATCTCTGATGAATAACCAAC<br>G | 5'FAM-ATGCTGAAACGCGAGAGAAACCGC-3'TAMRA            |
| ZIKV                             | CCGCTGCCCAACACAAG              | CCACTAACGTTCTTTGCAGAC<br>AT  | 5'FAM-AGCCTACCTTGACAAGCARTCAGACACTCAA-<br>3'TAMRA |
| JEV                              | CTGGTCCATAGGGAGTGGTTTC         | CTCCACGCTGTGCTCGAA           |                                                   |

**Sequences for siRNA synthesis**

| Gene              | Upper primer (SiRNA)  | Lower primer (SiRNA)  |
|-------------------|-----------------------|-----------------------|
| <i>HsHRD1</i> #1  | GCAUGGCAGUCCUGUACAUTT | AUGUACAGGACUGCCAUGCTT |
| <i>HsHRD1</i> #2  | UCAUCUGCCGAGAAGAGAUTT | AUCUCUUCUCGGCAGAUGATT |
| <i>HsSel1L</i> #1 | GCCAGGAUGAAUCCUAGATT  | UCUAAGGAUUCAUCCUGGCTT |
| <i>HsSel1L</i> #2 | GCAAUCUAAUAGCCACAUTT  | AUGUGGGCUAAUAGAUGCTT  |

**Sequences for qPCR of *HsHRD1*/*HsSel1L***

| Gene name      | Upper primer (qPCR)  | Lower primer (qPCR)  |
|----------------|----------------------|----------------------|
| <i>HsHRD1</i>  | CATTTTCATACCAGCTGCC  | GCTGAGGCAAGAGTGGTG   |
| <i>HsSel1L</i> | AGACAGCCTCAAGAGCCAAG | AATGGCGGTCAAAGCTGGTT |

**Sequences for *HsGAPDH*/*MusGAPDH***

| Gene name      | Upper primer (qPCR)    | Lower primer (qPCR)     |
|----------------|------------------------|-------------------------|
| <i>HsGAPDH</i> | AGCCTCAAGATCATCAGCAATG | ATGGACTGTGGTCATGAGTCCTT |

*MusGAPDH*

TCAACAGCAACTCCCCTCTCCA

ACCCTGTTGCTGTAGCCGTATTCA

**Supplementary Table 4**

**Table S4. Sequences of primers for plasmids construction**

| Plasmids                                | Upper primer (PCR)                                              | Lower primer (PCR)                                                                     | Upper primer (PCR)                                                   | Lower primer (PCR)                           |
|-----------------------------------------|-----------------------------------------------------------------|----------------------------------------------------------------------------------------|----------------------------------------------------------------------|----------------------------------------------|
| pET28a- <i>Aa</i> HRD1- $\Delta$ TM-His | GTCGACAAGCTTGC GGCCGCA<br>TGGTCAAGATTTACACACTTCC                | TGGTGGTGGTGGT GCTCGAG<br>ATCAGAGCTCATCTGGAAC                                           |                                                                      |                                              |
| pXJ-NS1-HA                              | TAGGGCGAATTCGGGCCGCA<br>CCATGGATAGTGGTTGCGTTGT                  | AACATCGTATGGGTAGGATC<br>CGGCTGTGACCAAGGAGT                                             |                                                                      |                                              |
| pXJ-NS2A-HA                             | TAGGGCGAATTCGGGCCGCA<br>CCATGGGAGTCAAAGTTCTGTT<br>TGCCCTGATCTGC | AGCGTAATCTGGAACATCGT<br>ATGGGTAGGATCCCCTTTTCT<br>TGCTGGTTCTTGAG                        | TTTGCCCTGATCTGCATCGCT<br>GTGGCCGAGGCCGTGACTCC<br>ATTGAAGGAGAAAGAAGAG |                                              |
| pXJ-NS2B-HA                             | TAGGGCGAATTCGGGCCGCA<br>CCATGGGAGTCAAAGTTCTGTT<br>TGCCCTGATCTGC | CATCGTATGGGTAGGATCCCC<br>GTTGTTTCTTCACTC                                               | TTTGCCCTGATCTGCATCGCT<br>GTGGCCGAGGCCGTGACTAG<br>CTGGCCACTAAATG      |                                              |
| pXJ-NS3-HA                              | GCGAATTCGGGCCGCA<br>GGCTGGAGTATTGTGG                            | CATCGTATGGGTAGGATCCCT<br>TTCTTCCAGCTGCAAACT                                            |                                                                      |                                              |
| pXJ-NS4A-HA                             | TAGGGCGAATTCGGGCCGCA<br>CCATGTCCCTGACCCTGAACCT<br>AA            | GAACATCGTATGGGTAGGAT<br>CCTCTCTGCTTTTCTGGTTCT<br>GG                                    |                                                                      |                                              |
| pXJ-NS4B-HA                             | TAGGGCGAATTCGGGCCGCA<br>CCATGGGAGTCAAAGTTCTGTT<br>TGCCCTGATCTGC | AACATCGTATGGGTAGGATC<br>CCCTTCTCGTGTGGTTGT                                             |                                                                      |                                              |
| pXJ-NS5-HA                              | CTATAGGGCGAATTCGGGCCG<br>CACCATGGGAACCTGGCAACAT<br>A            | AACATCGTATGGGTAGGATC<br>CCAGGACTCCTGCCTCTT                                             |                                                                      |                                              |
| pXJ- <i>Hs</i> HRD1-Myc                 | TATAGGGCGAATTCGGGCCG<br>ACCATGTTCCGCACGGCA                      | ATAAGATCTGGTACCCTCGA<br>GTCACAGATCCTCTTCTGAG<br>ATGAGTTTTTGTTCGGAT                     |                                                                      | AGATGAGTTTTTGTTCGGATC<br>CGTGGGCAACAGGAGACTC |
| pXJ- <i>Hs</i> HRD1-C329S-Myc           | TATAGGGCGAATTCGGGCCG<br>ACCATGTTCCGCACGGCA                      | GGACATCCATACGGGAGGTG<br>GGGCAGGTCT                                                     | AGACCTGCCCCACCTCCCGTA<br>TGGATGCC                                    | AGATGAGTTTTTGTTCGGATC<br>CGTGGGCAACAGGAGACTC |
| pXJ- <i>A.a</i> HRD1-Flag               | GCGAATTCGGGCCGCA<br>GAGAGCCATCGGAATTTCA                         | GATCTGGTACCCTCGAGCTA<br>CTTATCGTCGTCATCCTTGTA<br>ATCGGATCCGTCGGAGGACA<br>TCCTTGAGCCAAA |                                                                      |                                              |
| pXJ-NS4A-Flag                           | GGCGAATTCGGGCCGCA<br>TGCCCTGACCCTGAACCTAA                       | GTCGTCATCCTTGTAATCGG<br>ATCCTCTCTGCTTTTCTGGTT<br>CTGGA                                 |                                                                      |                                              |

**Table S4. Sequences of primers for plasmids construction**

| Plasmids                        | Upper primer (PCR)                                   | Lower primer (PCR)                                                                | Upper primer (PCR)                           | Lower primer (PCR)                                        |
|---------------------------------|------------------------------------------------------|-----------------------------------------------------------------------------------|----------------------------------------------|-----------------------------------------------------------|
| pXJ-NS4A-K20R-Flag              | GGCGAATTCGCGGCCGCACCA<br>TGTCCTGACCCTGAACCTAA        | TGTCCAGTGCCTCTCTTGCC<br>CGCTGAGTCATGAAAGT                                         | ACTTTCATGACTCAGCGGGCA<br>AGAGACGCACTGGACA    | GTCGTCATCCTTGTAATCGGA<br>TCCTCTGCTTTTCTGGTTCT<br>GGA      |
| pXJ-NS4A-K80R-Flag              | GGCGAATTCGCGGCCGCACCA<br>TGTCCTGACCCTGAACCTAA        | ACATTCCCAGGGTCATCCGC<br>CCTATACCCCTTCCGCTC                                        | GAGCGGAAGGGGTATAGGGC<br>GGATGACCCTGGGAATGT   | GTCGTCATCCTTGTAATCGGA<br>TCCTCTGCTTTTCTGGTTCT<br>GGA      |
| pXJ-NS4A-K125R-Flag             | GGCGAATTCGCGGCCGCACCA<br>TGTCCTGACCCTGAACCTAA        | GTCGTCATCCTTGTAATCGG<br>ATCCTCTGCGGTTCTGGTT<br>CTGG                               |                                              |                                                           |
| pUb- <i>A.a</i> HRD1-Myc        | CTCAACAGAGATTTCAACGAA<br>TCATGCGTGCCATCGGAATATC      | CTCAACATCATCTCTCGATTA<br>CAGATCCTTTCAGAGATGA<br>GTTTCTGCTCATCAGAGCTC<br>ATCCTGGAA |                                              |                                                           |
| pUb- <i>A.a</i> HRD1-C328S-Myc  | CTCAACAGAGATTTCAACGAA<br>TCATGCGTGCCATCGGAATATC      | GCAGAATGTTCAACCGGGAT<br>GTTGGACAAGTTTGCTGCCG                                      | CGGCAGCAAACCTTGTC AAC<br>ATCCCGTTGAACATTCTGC | TTCAGAGATGAGTTTCTGCTC<br>ATCAGAGCTCATCCTGGAACC            |
| pUb-NS4A-3XFlag                 | CAACAGAGATTTCAACGAATC<br>ATGAGTCTCACCTGAATC          | CTCAACATCATCTCTCGATTA<br>CTTGTCGTCGTCGCTTTATA<br>ATCGATGTCGTGATCTTTGTA<br>ATC     |                                              | ATTACTTGTCGTCGTCGCTTTT<br>ATAATCGATGTCGTGATCTTTG<br>TAATC |
| pUb-NS4A-K20R-3XFlag            | CAACAGAGATTTCAACGAATC<br>ATGAGTCTCACCTGAATC          | GGCGTCGCGGGCCCGCTGG<br>GTCATGAACGT                                                | ACGTCATGACCCAGCGGGCC<br>CGCGACGCC            | CCGTCGTGATCCTTGTAGTCG<br>CGCT                             |
| pUb-NS4A-K80R-3XFlag            | CAACAGAGATTTCAACGAATC<br>ATGAGTCTCACCTGAATC          | CATGCCCAGGGTCATTCGGC<br>CGATACCCCTGC                                              | GCAGGGGTATCGGCCGAATG<br>ACCCTGGGCATG         | CCGTCGTGATCCTTGTAGTCG<br>CGCT                             |
| pUb-NS4A-K125R-3XFlag           | CAACAGAGATTTCAACGAATC<br>ATGAGTCTCACCTGAATC          | GGCGAATTCGCGGCCGCACC<br>ATGTCCTGACCCTGAACCT<br>AA                                 |                                              |                                                           |
| pUb-NS4A-T2A-Puro               | TATAAAGACGACGACGACAAG<br>GAGGGCCGCGCAGCCTGC          | TGCTCAACATCATCCGATTAT<br>CAGGCACCGGGCTTGCGGG                                      | TAATCGGATGATGTTGAGCAA<br>TAA                 | CTTGTCGTCGTCGCTTTATAA<br>TCG                              |
| pUb-NS4A- $\Delta$ N40-3XFlag   | CAACAGAGATTTCAACGAATC<br>ATGTATAACCACGCACTTAGCG<br>A | CCGTCGTGATCCTTG TAGTC<br>GCGCTGCTTTTCTGGCTCGG                                     |                                              |                                                           |
| pUb-NS4A- $\Delta$ C40-3XFlag   | CAACAGAGATTTCAACGAATC<br>ATGAGTCTCACCTGAATC          | CCGTCGTGATCCTTG TAGTC<br>ACAACACATGCCAGGGTC                                       |                                              |                                                           |
| pUb-NS4A- $\Delta$ 41-87-3XFlag | CAACAGAGATTTCAACGAATC<br>ATGAGTCTCACCTGAATC          | AAATCGAGGCGGTAATGATA<br>GCACGTCTCCTGCCTCA                                         | TGAGGCAGGAGGACGTGCTA<br>TCATTACCGCCTCGATT    | CCGTCGTGATCCTTG TAGTCG<br>CGCT                            |

**Table S4. Sequences of primers for plasmids construction**

| Plasmids                      | Upper primer (PCR)                               | Lower primer (PCR)                                   | Upper primer (PCR)                           | Lower primer (PCR)                                   |
|-------------------------------|--------------------------------------------------|------------------------------------------------------|----------------------------------------------|------------------------------------------------------|
| pUb- <i>AaSRα</i> -Myc        | CTCAACAGAGATTTCAACGAA<br>TCATGTTGGATTTGTTCCACCAT | TCTTCAGAGATGAGTTTCTG<br>CTCCTTCATCAACGCATGTAC<br>GA  |                                              |                                                      |
| pMT- <i>A.aHRD1</i> -V5       | GATCTAGATCGGGGTACCATGC<br>GTGCCATCGGAATATC       | TTCGAAGGGCCCTCTAGACT<br>CGAGATCAGAGCTCATCCTG<br>GAAC |                                              |                                                      |
| pMT- <i>A.aHRD1</i> -C328S-V5 | GATCTAGATCGGGGTACCATGC<br>GTGCCATCGGAATATC       | GCAGAATGTTCAACCGGGAT<br>GTTGGACAAGTTTGATGCCG         | CGGCAGCAAACCTGTCCAAC<br>ATCCCGTTGAACATTCTGC  | TTCGAAGGGCCCTCTAGACTC<br>GAGATCAGAGCTCATCCTGGA<br>AC |
| pAC- <i>A.aHRD1</i> -V5       | AGTCCAGTGTGGTGGAATTCAT<br>GCGTGCCATCGGAATATC     | CGAAGGGCCCTCTAGACTCG<br>AGATCAGAGCTCATCCTGGA<br>AC   |                                              |                                                      |
| pAC- <i>A.aHRD1</i> -C328S-V5 | AGTCCAGTGTGGTGGAATTCAT<br>GCGTGCCATCGGAATATC     | AGTCCAGTGTGGTGGAATTC<br>ATGCGTGCCATCGGAATATC         |                                              |                                                      |
| pMT-GFP-V5                    | GATCTAGATCGGGGTACCATGG<br>TGAGCAAGGGCGAGGAGCT    | GAAGGGCCCTCTAGACTCGA<br>GCTTGTACAGCTCGTCCATG         |                                              |                                                      |
| pMT- <i>AaSRα</i> -V5         | GGGATCTAGATCGGGGTACCAT<br>GTTGGATTTGTTCCACCAT    | TTCGAAGGGCCCTCTAGACT<br>CGAGCTTCATCAACGCATGT<br>ACGA |                                              |                                                      |
| pMT- <i>AaSRP54</i> -Myc      | GGGATCTAGATCGGGGTACCAT<br>GGTTTTAGCGGATCTCGGTCG  | GAGATGAGTTTTTGTTCAGA<br>CTTACCGAATCCGCCCATCA         |                                              |                                                      |
| AAV-eGFP                      | /                                                | /                                                    |                                              |                                                      |
| pUb-JEV-NS4A/K79R-3XFlag      | AACAGGATTTCAACGAATCATG<br>TCAGCTGTCAAGTTTATCGAAG | CCGTCGTGATCCTTGTAGTC<br>CCTTTGTTTTTCAGGCTCTG         |                                              |                                                      |
| pMT- <i>CqHRD1</i> -V5        | GATCTAGATCGGGGTACCATGC<br>GTGCCCTCGGGATA         | TTCGAAGGGCCCTCTAGACT<br>CGAGGTTGGCTCCAGACGA<br>GGCGG |                                              |                                                      |
| pMT- <i>CqHRD1</i> -C328S-V5  | GATCTAGATCGGGGTACCATGC<br>GTGCCCTCGGGATA         | GTGCGCAGAATGTTCAACCG<br>AGAGGTCGGGCACGTCTGCT         | AGCCGACGTGCCCGACCTCTC<br>GGTTGAACATTCTGCGCAC | TTCGAAGGGCCCTCTAGACTC<br>GAGGTTGGCTCCAGACGAGG<br>CGG |

## SI reference

1. O. Faye *et al.*, Quantitative real-time PCR detection of Zika virus and evaluation with field-caught mosquitoes. *Virologica J.* **10**, 311 (2013).
